# Supplementary material for: Comparative Transcriptome Analysis Quantifies Immune Cell Transcript Levels, Metastatic Progression, and Survival in Osteosarcoma
Source: Oxford University Press journal article supplement (doi:10.1158/0008-5472.can-17-0576), 2017-10-24
Supplement: 00085472can170576-sup-179131_3_supp_4323416_mxs87j.xlsx [file 00085472can170576-sup-179131_3_supp_4323416_mxs87j.xlsx]

## Sheet: Sheet1
Supplementary Table 2
Outcome tumor counts and number of outcome events
dataset	tumors	deaths
DOS	19	19
	tumors	deaths	met at diagnosis
HOS2	35	17	17
	tumors	deaths	time until metastasis
GSE212257	53	23	34
	tumors	deaths
BLCA	266	108
BRCA	1054	157
CESC	98	28
COAD	415	91
GBM	152	118
HNSC	499	211
KIRC	529	175
LIHC	194	89
LUAD	463	156
LUSC	476	201
OV	302	172
PAAD	180	93
PRAD	417	8
READ	157	21
SKCM	380	187
GCESS OUTCOME threshold values
DOS	Mimimum	Maximum	Q1	Q2	Q3
cluster 3	-336	169	-130	-27	10
HOS-2	Mimimum	Maximum	Q1	Q2	Q3
cluster 1	-892	569	-425	-247	-65
cluster 4	-422	205	-170	-5	32
cluster 8	-519	463	-405	-276	-157
TCGA HOS cluster 1
	Mimimum	Maximum	Q1	Q2	Q3
BLCA	-782	246	-416	-268	-115
BRCA	-632	218	-257	-161.1	-69.5
CESC	-653	245	-320	-180	-92
COAD	-1004	181	-335	-218.2	-133.1
GBM	-560	273	-230	-110	-29.5
HNSC	-824	181	-299	-187.5	-69
KIRC	-593	299	-54	17	92.4
LIHC	-619	211	-351.3	-233	-139.72
LUAD	-576	271	-101	-6	75
LUSC	-624		-238	-115	-3.5
OV	-647	191	-254	-136.1	-49.05
PAAD	-598	218	-145.7	-45.7	-32.5
PRAD	-650	135.73	-430	-350	-262.5
READ	-619	102	325	-238	-150
SKCM	-824	333	-365	-200	-26
TCGA HOS cluster 4
	Mimimum	Maximum	Q1	Q2	Q3
BLCA	-592	312	-18	85.5	148
BRCA	-683	294	-162	-35	68.9
CESC	-717	275	148.6	187	225
COAD	-465	335	38	91.3	142
GBM	-569	176	-115	-28	38
HNSC	-301	335	22	90.15	157
KIRC	-807	228	-445.1	-378.5	-292
LIHC	-762	188	-401	-205	-50
LUAD	-595	300	-244	-95	23
LUSC	-553	265	44.5	110.5	153
OV	-540	248	-15.5	57	113
PAAD	-832	149	-277	-207.3	-122
PRAD	-752	153	-535.5	-459.1	-360
READ	-162	229	22.5	85	138
SKCM	-458	270	-69.2	14.5	84.4
TCGA HOS cluster 8
	Mimimum	Maximum	Q1	Q2	Q3
BLCA	-840	299	-483	-333.5	-146
BRCA	-813	437	-350.5	-212	-81.3
CESC	-767	330	-305	-213.42	-78
COAD	-1039	270	-357	-225.3	-129
GBM	-1866	-43	-553	-438.3	-336
HNSC	-772	307	-336	-195	-52
KIRC	-801	267	-166	-77.1875	22
LIHC	-799	307	-483	-373.9	-226
LUAD	-722	312	-153	-39	57
LUSC	-643	410	-255.5	-143.31	-19
OV	-828	167	-392	-263	-158.2
PAAD	-669	358	-238	-122	-1
PRAD	-764	282	-420	-329	-223.5
READ	-591	89	-350.2	-248	-168
SKCM	-882	457	-456	-233	-15
