# Supplementary material for: Comparative Transcriptome Analysis Quantifies Immune Cell Transcript Levels, Metastatic Progression, and Survival in Osteosarcoma
Source: Oxford University Press journal article supplement (doi:10.1158/0008-5472.can-17-0576), 2017-10-24
Supplement: 00085472can170576-sup-179131_3_supp_4323418_kxs87j.xlsx [file 00085472can170576-sup-179131_3_supp_4323418_kxs87j.xlsx]

## Sheet: Supp Table 5
Supplementary Table 5
Top 10 annotations from IPA for human clusters
Human Cluster 1
Diseases or Functions Annotation	p-Value	Molecules	# Molecules
function of leukocytes	3.03e-70	ADORA3,ARHGDIB,ATP,BTK,C3AR1,CCR1,CCR2,CCR5,CCRL2,CD14,CD200R1,CD209,CD28,CD300A,CD300LF,CD4,CD74,CD86,CIITA,CLEC7A,CRTAM,CSF1R,CSF2RB,CTSS,CXCR4,CYBB,DOCK8,DOK2,FCER1G,FCGR2A,FCGR2B,FES,FGR,FUT7,FYB,GIMAP4,HAVCR2,HCK,HCLS1,HCST,HLA-DMA,HLA-DQB1,HLA-E,IFI30,IL10,IL10RA,IL12RB1,IL2RA,IL2RG,INPP5D,IRF5,ITGAL,ITGAM,ITGB2,ITGB7,LCP1,LGALS9,LILRB3,LILRB4,MSR1,MYO1G,NCF1,NLRC4,P2RY6,PECAM1,PILRA,PLCB2,…	96
function of blood cells	9.82e-70	ADORA3,ARHGDIB,ATP,BTK,C3AR1,CCR1,CCR2,CCR5,CCRL2,CD14,CD200R1,CD209,CD28,CD300A,CD300LF,CD4,CD74,CD86,CIITA,CLEC7A,CRTAM,CSF1R,CSF2RB,CTSS,CXCR4,CYBB,DOCK8,DOK2,FCER1G,FCGR2A,FCGR2B,FES,FGR,FUT7,FYB,GIMAP4,HAVCR2,HCK,HCLS1,HCST,HLA-DMA,HLA-DQB1,HLA-E,IFI30,IL10,IL10RA,IL12RB1,IL2RA,IL2RG,INPP5D,IRF5,ITGAL,ITGAM,ITGB2,ITGB7,LCP1,LGALS9,LILRB3,LILRB4,LYL1,MSR1,MYO1G,NCF1,NLRC4,P2RY6,PECAM1,PILRA,P…	99
proliferation of mononuclear leukocytes	2.63e-69	AIF1,ARHGDIB,ATP,BATF,BLNK,BTK,C5AR1,CCL4,CCR2,CCR5,CD14,CD180,CD209,CD28,CD300A,CD300C,CD33,CD37,CD4,CD48,CD74,CD86,CIITA,CLEC4A,CLECL1,CORO1A,CRTAM,CSF1R,CSF2RB,CXCR4,CYTIP,DAPP1,DOCK2,DOCK8,DOK2,FCER1G,FCGR2A,FCGR2B,FCGR3A/FCGR3B,FGL2,FYB,GAPT,GRAP,HAVCR2,HCK,HCLS1,HLA-DMA,HLA-DMB,HLA-DPA1,HLA-DPB1,HLA-DQA1,HLA-DQB1,HLA-DRB1,HLA-E,IKZF1,IL10,IL10RA,IL12RB1,IL1RN,IL2RA,IL2RG,INPP5D,ITGAL,ITGAM,…	110
proliferation of immune cells	4.17e-69	AIF1,ARHGDIB,ATP,BATF,BLNK,BTK,C5AR1,CCL3,CCL4,CCR2,CCR5,CD14,CD180,CD209,CD28,CD300A,CD300C,CD33,CD37,CD4,CD48,CD74,CD86,CIITA,CLEC4A,CLECL1,CORO1A,CRTAM,CSF1R,CSF2RB,CSF3R,CXCR4,CYSLTR1,CYTIP,DAPP1,DOCK2,DOCK8,DOK2,FCER1G,FCGR2A,FCGR2B,FCGR3A/FCGR3B,FGL2,FYB,GAPT,GRAP,HAVCR2,HCK,HCLS1,HLA-DMA,HLA-DMB,HLA-DPA1,HLA-DPB1,HLA-DQA1,HLA-DQB1,HLA-DRB1,HLA-E,IKZF1,IL10,IL10RA,IL12RB1,IL1RN,IL2RA,IL2RG,…	113
proliferation of blood cells	3.55e-68	AIF1,ARHGDIB,ATP,BATF,BLNK,BTK,C5AR1,CCL3,CCL4,CCR2,CCR5,CD14,CD163,CD180,CD209,CD28,CD300A,CD300C,CD33,CD37,CD4,CD48,CD74,CD86,CIITA,CLEC4A,CLECL1,CORO1A,CRTAM,CSF1R,CSF2RB,CSF3R,CXCR4,CYSLTR1,CYTIP,DAPP1,DOCK2,DOCK8,DOK2,FCER1G,FCGR2A,FCGR2B,FCGR3A/FCGR3B,FGL2,FYB,GAPT,GRAP,HAVCR2,HCK,HCLS1,HLA-DMA,HLA-DMB,HLA-DPA1,HLA-DPB1,HLA-DQA1,HLA-DQB1,HLA-DRB1,HLA-E,IKZF1,IL10,IL10RA,IL12RB1,IL1RN,IL2RA,…	115
proliferation of lymphocytes	9.63e-68	AIF1,ARHGDIB,ATP,BATF,BLNK,BTK,C5AR1,CCL4,CCR2,CCR5,CD14,CD180,CD209,CD28,CD300A,CD300C,CD33,CD37,CD4,CD48,CD74,CD86,CIITA,CLEC4A,CLECL1,CORO1A,CRTAM,CSF2RB,CXCR4,CYTIP,DAPP1,DOCK2,DOCK8,DOK2,FCER1G,FCGR2A,FCGR2B,FCGR3A/FCGR3B,FGL2,FYB,GAPT,GRAP,HAVCR2,HCK,HCLS1,HLA-DMA,HLA-DMB,HLA-DPA1,HLA-DPB1,HLA-DQA1,HLA-DQB1,HLA-DRB1,HLA-E,IKZF1,IL10,IL12RB1,IL1RN,IL2RA,IL2RG,INPP5D,ITGAL,ITGAM,ITGAX,ITGB2,L…	108
quantity of leukocytes	8.43e-64	ADAM8,ADORA3,ARHGDIB,BATF,BLNK,BTK,C1QA,C3AR1,C5AR1,CCL3,CCL4,CCR1,CCR2,CCR5,CD180,CD200R1,CD28,CD300A,CD300LF,CD4,CD48,CD74,CD86,CIITA,CLEC4A,CLEC7A,CORO1A,CRTAM,CSF1R,CSF2RB,CSF3R,CTSS,CXCR4,CYBB,CYTIP,DAPP1,DOCK2,DOCK8,DOK2,FAM26F,FCER1G,FCGR2A,FCGR2B,FERMT3,FES,FUT7,FYB,GAPT,GIMAP1-GIMAP5,GRAP,HAVCR2,HCK,HCLS1,HCST,HLA-DMA,HLA-DQA1,HLA-DQB1,HLA-DRB1,IKZF1,IL10,IL10RA,IL12RB1,IL1RN,IL2RA,IL2RG…	113
activation of leukocytes	5.81e-62	ATP,BLNK,BTK,C1QA,C3AR1,C5AR1,CASP1,CCL3,CCL4,CCL8,CCR2,CCR5,CD14,CD163,CD180,CD209,CD28,CD300A,CD300LB,CD300LF,CD37,CD4,CD48,CD74,CD86,CD93,CLEC7A,CORO1A,CRTAM,CSF1R,CSF2RB,CTSS,CYBB,DAPP1,DOCK2,DOK3,FCER1G,FCGR2A,FCGR2B,FCGR3A/FCGR3B,GIMAP1-GIMAP5,HAVCR2,HCK,HLA-DMA,HLA-DMB,HLA-DOA,HLA-DPA1,HLA-DPB1,HLA-DQA1,HLA-DQB1,HLA-DRA,HLA-DRB1,IL10,IL12RB1,IL1RN,IL2RA,IL2RG,INPP5D,IRF5,ITGAL,ITGAM,ITGB2,…	101
activation of blood cells	6.07e-61	ATP,BLNK,BTK,C1QA,C3AR1,C5AR1,CASP1,CCL3,CCL4,CCL8,CCR2,CCR5,CD14,CD163,CD180,CD209,CD28,CD300A,CD300LB,CD300LF,CD37,CD4,CD48,CD74,CD86,CD93,CLEC7A,CORO1A,CRTAM,CSF1R,CSF2RB,CTSS,CYBB,DAPP1,DOCK2,DOK3,FCER1G,FCGR2A,FCGR2B,FCGR3A/FCGR3B,GIMAP1-GIMAP5,HAVCR2,HCK,HLA-DMA,HLA-DMB,HLA-DOA,HLA-DPA1,HLA-DPB1,HLA-DQA1,HLA-DQB1,HLA-DRA,HLA-DRB1,IL10,IL12RB1,IL1RN,IL2RA,IL2RG,INPP5D,IRF5,ITGAL,ITGAM,ITGB2,…	103
leukocyte migration	4.05e-60	ADAM8,ADORA3,AIF1,ALOX5AP,ATP,BATF,BTK,C3AR1,C5AR1,CASP1,CCL3,CCL4,CCL8,CCR1,CCR2,CCR5,CCRL2,CD14,CD209,CD28,CD300LF,CD4,CD48,CD74,CD86,CD93,CIITA,CLEC7A,CORO1A,CSF1R,CSF2RB,CSF3R,CTSS,CXCR4,CYBB,CYSLTR1,CYTIP,DOCK2,DOCK8,FCER1G,FCGR2A,FCGR2B,FCGR3A/FCGR3B,FERMT3,FGR,FUT7,FYB,GPR34,HCK,HCLS1,IL10,IL10RA,IL12RB1,IL1RN,IL2RA,INPP5D,IRF5,ITGAL,ITGAM,ITGAX,ITGB2,ITGB7,JAML,KCNE3,LCP1,LCP2,LGALS9,LILR…	110
Human Cluster 3
Diseases or Functions Annotation	p-Value	Molecules	# Molecules
muscle contraction	9.8e-54	ACTA1,ACTN2,ATP1A2,ATP2A1,ATP2A2,CACNA1S,CACNG1,CASQ1,CASQ2,CAV3,CHRNB1,CHRND,CHRNG,CLCN1,CSRP3,DES,JSRP1,KLHL41,MYBPC1,MYBPC2,MYBPH,MYH1,MYH2,MYH6,MYH7,MYH8,MYL1,MYL2,MYL3,MYLK2,MYLPF,MYOM1,MYOM2,MYOT,NEB,NOS1,PGAM2,PRKAA2,RYR1,RYR3,SCN4A,SMPX,SRL,STAC3,TCAP,TMOD4,TNNC1,TNNC2,TNNI1,TNNI2,TNNT1,TRDN,TRIM54,TRIM63,TTN	55
contraction of striated muscle	1.19e-41	ATP1A2,ATP2A1,ATP2A2,CACNA1S,CASQ2,CAV3,CHRNB1,CHRND,CHRNG,CSRP3,JSRP1,KLHL41,MYBPH,MYH1,MYH6,MYH7,MYH8,MYL1,MYL2,MYL3,MYLK2,NOS1,PGAM2,PRKAA2,RYR3,SMPX,SRL,STAC3,TCAP,TNNC1,TNNC2,TNNI1,TNNI2,TNNT1,TRIM54,TRIM63,TTN	37
morphology of muscle cells	2.71e-37	ACTA1,ANKRD2,ANKRD23,ATP2A2,CACNB1,CAPN3,CASQ2,CAV3,CFL2,CHRNG,CSRP3,CTNNA3,DES,JPH1,LDB3,MB,MYF6,MYH2,MYH6,MYLK3,MYOD1,MYOG,NEB,PDLIM5,PFKM,RYR1,SRL,SYPL2,TMEM38A,TNNT1,TRDN,TRIM54,TRIM55,TRIM63,TTN,XIRP1	36
morphology of muscle	7e-34	ACTA1,ANKRD2,ANKRD23,APOBEC2,ATP2A1,ATP2A2,CACNB1,CAPN3,CASQ2,CAV3,CFL2,CHRNG,CSRP3,CTNNA3,DES,JPH1,LDB3,MB,MYF6,MYH1,MYH2,MYH6,MYLK3,MYLPF,MYOD1,MYOG,MYOZ1,NEB,PDLIM5,PFKM,RYR1,SLC2A4,SMTNL1,SRL,SYPL2,TMEM38A,TNNT1,TRDN,TRIM54,TRIM55,TRIM63,TRIM72,TTN,XIRP1	44
formation of muscle	3.75e-32	ACHE,ACTA1,ACTN2,CACNA1S,CAPN3,CASQ1,CASQ2,CAV3,CFL2,CHRNB1,CSRP3,DES,ESRRG,FHL1,JPH1,KLHL41,LDB3,MYF6,MYH2,MYH6,MYH7,MYL2,MYL3,MYLK2,MYLK3,MYLPF,MYOD1,MYOG,MYOM1,MYOZ1,MYPN,NEB,NOS1,OBSCN,PPP2R3A,SMTNL1,SVIL,SYPL2,TCAP,TNNC1,TNNI1,TNNI2,TRIM72,TTN,XIRP1,XIRP2	46
abnormal morphology of muscle	1.68e-31	ACTA1,ANKRD2,ANKRD23,APOBEC2,ATP2A1,ATP2A2,CACNB1,CAPN3,CASQ2,CAV3,CFL2,CHRNG,CSRP3,CTNNA3,DES,JPH1,LDB3,MB,MYF6,MYH1,MYH6,MYLK3,MYOG,MYOZ1,NEB,PDLIM5,PFKM,RYR1,SLC2A4,SMTNL1,SRL,SYPL2,TMEM38A,TNNT1,TRDN,TRIM54,TRIM55,TRIM63,TRIM72,TTN,XIRP1	41
contractility of muscle	1.81e-31	ATP1A2,ATP2A1,ATP2A2,CACNB1,CASQ2,CAV3,CKM,CSRP3,CTNNA3,DES,JPH1,KCNJ11,MB,MYH1,MYH6,MYH7,MYLK2,MYLK3,NEB,NOS1,PDLIM5,RYR1,RYR3,SLC2A4,SRL,STAC3,SYPL2,TNNT1,TRIM54,TRIM55,TRIM63,TRIM72,TTN,XIRP1	34
function of muscle	9.43e-31	ACTA1,ANKRD2,ANKRD23,APOBEC2,ATP1A2,ATP2A1,ATP2A2,CACNB1,CASQ2,CAV3,CHRNG,CKM,CSRP3,CTNNA3,DES,ESRRG,JPH1,JSRP1,MB,MYH1,MYH6,MYH7,MYLK3,MYOG,MYOZ1,NEB,NOS1,PDLIM5,PFKM,PPP1R1A,RYR1,SLC2A4,SRL,SYPL2,TMEM38A,TNNT1,TRDN,TRIM54,TRIM55,TRIM63,TRIM72,TTN,XIRP1	43
hereditary myopathy	5.41e-30	ACTN2,ACTN3,AMPD1,ATP2A1,CACNA1S,CAPN3,CAV3,CLCN1,CSRP3,CTNNA3,DES,FHL1,GPD1L,GYG1,JPH1,KLHL40,KLHL41,LDB3,LMOD3,MB,MYH2,MYH6,MYH7,MYH8,MYL1,MYL2,MYL3,MYLK2,MYOG,MYOM1,MYOT,MYOZ2,MYPN,NEB,PDLIM3,RYR1,SCN4A,SLC25A4,TCAP,TMOD4,TNNC1,TNNT1,TRIM63,TTN,UCP3	45
hypertrophic cardiomyopathy	2.56e-26	ACTA1,ACTN2,CACNG1,CAV3,CSRP3,CTNNA3,DES,FHL1,LDB3,MYH6,MYH7,MYL2,MYL3,MYLK2,MYOM1,MYOZ2,MYPN,PDLIM3,SLC25A4,TCAP,TNNC1,TRIM54,TRIM63,TTN	24
Human Cluster 4
Diseases or Functions Annotation	p-Value	Molecules	# Molecules
mitosis	4.34e-56	ANLN,AURKA,AURKB,BIRC5,BLM,BUB1,BUB1B,CASC5,CCNA2,CCNB1,CDC20,CDC25A,CDC25C,CDC7,CDCA5,CDCA8,CDK1,CDKN3,CENPA,CENPE,CENPF,CENPH,CENPW,CIT,DLGAP5,E2F1,E2F2,ESCO2,ESPL1,FBXO43,FOXM1,HELLS,KIF11,KIF15,KIF18A,KIF18B,KIF2C,KIF4A,KIF4B,KIFC1,KNTC1,MAD2L1,MYBL2,NDC80,NEK2,NUF2,NUSAP1,ORC6,PKMYT1,PLK1,PLK4,PTTG1,RACGAP1,SGOL1,SKA1,SKA3,SPAG5,SPC25,STIL,STMN1,TOP2A,TPX2,TTK,UBE2C,UBE2S,XRCC2,ZWINT	67
cell cycle progression	5.67e-55	ANLN,AURKA,AURKB,BIRC5,BLM,BUB1,BUB1B,CASC5,CCNA2,CCNB1,CCNE2,CCNF,CDC20,CDC25A,CDC25C,CDC6,CDC7,CDCA5,CDCA8,CDK1,CDKN3,CENPA,CENPE,CENPF,CENPH,CENPW,CIT,CKS1B,CKS2,CLSPN,DIAPH3,DLGAP5,DTL,E2F1,E2F2,ESCO2,ESPL1,EZH2,FAM72A,FANCA,FANCD2,FBXO43,FOXM1,GTSE1,HELLS,KIAA0101,KIF11,KIF15,KIF18A,KIF18B,KIF2C,KIF4A,KIF4B,KIFC1,KNTC1,MAD2L1,MCM2,MELK,MKI67,MYBL2,NDC80,NEK2,NUF2,NUSAP1,ORC6,PKMYT1,PLK1,PLK4…	87
segregation of chromosomes	4.19e-49	AURKA,AURKB,BUB1,CCNA2,CCNB1,CCNB2,CDC6,CDCA2,CENPE,CENPF,CENPH,CENPW,CIT,ECT2,ESCO2,ESPL1,EXO1,HJURP,KIF11,KIF2C,MAD2L1,NCAPG,NCAPH,NDC80,NEK2,NUF2,NUSAP1,PLK1,PTTG1,RAD51,SGOL1,SKA1,SKA3,SPAG5,SPC25,TOP2A,TPX2,ZWINT	38
mitosis of cervical cancer cell lines	9.66e-38	AURKA,BIRC5,BUB1,CASC5,CCNB1,CDC20,CDC25A,CDC25C,CDCA8,CDK1,CENPE,DLGAP5,KIF11,KIF4A,MAD2L1,NDC80,NUF2,PKMYT1,PLK1,PLK4,PTTG1,RACGAP1,SPAG5,SPC25,STIL,TOP2A,TPX2,TTK,UBE2S	29
mitosis of tumor cell lines	1.86e-37	AURKA,BIRC5,BUB1,BUB1B,CASC5,CCNB1,CDC20,CDC25A,CDC25C,CDC7,CDCA8,CDK1,CENPE,DLGAP5,FOXM1,KIF11,KIF4A,MAD2L1,NDC80,NUF2,PKMYT1,PLK1,PLK4,PTTG1,RACGAP1,SPAG5,SPC25,STIL,TOP2A,TPX2,TTK,UBE2S	32
M phase	3.94e-34	ANLN,AURKA,AURKB,BIRC5,BUB1B,CCNB1,CDC20,CDC6,CDK1,CDT1,CENPE,CEP55,CIT,CKS2,DIAPH3,ECT2,KIF14,KIF20A,KIF23,KIF4A,KIF4B,KIFC1,MAD2L1,MCM4,NDC80,NEK2,NUF2,NUSAP1,PLK1,PRC1,PTTG1,RACGAP1,RAD51,SPDL1,TOP2A,TRIP13,UBE2C	37
arrest in mitosis	8.16e-34	AURKB,BIRC5,BLM,BUB1,BUB1B,CASC5,CDC20,CDK1,CENPE,KIF11,KIF4A,KNTC1,MAD2L1,MYBL2,NDC80,NUF2,PLK1,PLK4,RACGAP1,SGOL1,SPAG5,SPC25,TPX2,TTK,UBE2S,ZWINT	26
uterine serous papillary cancer	2.52e-27	AURKA,BUB1,BUB1B,CCNA2,CCNB1,CCNB2,CDC20,CDC6,CENPA,CIT,CKS1B,ESPL1,EXO1,FEN1,FOXM1,HMMR,KIF11,KIF2C,KIFC1,KPNA2,MYBL2,PLK1,PTTG1,SPC25,TK1,TOP2A,TPX2,TRIP13,TTK,UBE2C,UBE2S	31
M phase of tumor cell lines	2.93e-27	ANLN,AURKB,BIRC5,CDT1,CEP55,DIAPH3,ECT2,KIF14,KIF20A,KIF23,KIF4A,KIF4B,KIFC1,MAD2L1,NDC80,NEK2,NUF2,PLK1,PTTG1,RACGAP1,SPDL1,TOP2A,TRIP13	23
checkpoint control	3.66e-25	BUB1,BUB1B,CCNB1,CCNB2,CCNE2,CDC20,CDC25A,CDC25C,CDC6,CDC7,CKS1B,CKS2,E2F1,E2F2,EXO1,FANCD2,KNTC1,MAD2L1,NDC80,PLK1,PTTG1,ZWINT	22
Human Cluster 8
Diseases or Functions Annotation	p-Value	Molecules	# Molecules
proliferation of lymphocytes	1.51e-50	ACPP,BTLA,CARD11,CCDC88B,CCL5,CCR6,CCR7,CD2,CD226,CD244,CD247,CD27,CD3E,CD3G,CD40LG,CD5,CD6,CD69,CD79B,CD8A,DEF6,EOMES,FASLG,FCRL3,GPR174,ICOS,IGLL1/IGLL5,IKZF3,IRF1,IRF4,IRF8,KLRB1,KLRC4-KLRK1/KLRK1,KLRD1,LCK,LTA,LY75,LY9,LYN,MAP4K1,PIK3AP1,PIK3CD,PIK3CG,PIM2,PLCG2,POU2AF1,POU2F2,PRF1,PRKCB,PRKCD,PTPRCAP,PTPRJ,RASGRP1,RASSF5,RHOH,SH2D1A,SIT1,SKAP1,SLAMF1,SPN,STAT4,TBC1D10C,TBX21,TESPA1,THEMIS,TI…	73
activation of lymphocytes	1.03e-47	BTLA,CARD11,CCDC88B,CCL5,CCR7,CD2,CD226,CD244,CD247,CD27,CD3D,CD3E,CD3G,CD40LG,CD5,CD6,CD69,CD7,CD79B,CD8A,DEF6,FASLG,FCRL3,ICOS,IRF1,IRF4,IRF8,KLRB1,KLRC4-KLRK1/KLRK1,KLRD1,KLRF1,LAX1,LCK,LYN,NCR3,NLRC3,NOD2,PIK3CD,PIK3CG,PLCG2,POU2AF1,PRF1,PRKCB,PTPRJ,RASGRP1,SH2D1A,SIRPG,SIT1,SLA2,SLAMF1,SPN,STAT4,TBC1D10C,TBX21,TIGIT,TLR4,TNFRSF13B,UNC13D,ZAP70	59
activation of mononuclear leukocytes	1.39e-47	ARRB2,BTLA,CARD11,CCDC88B,CCL5,CCR7,CD2,CD226,CD244,CD247,CD27,CD3D,CD3E,CD3G,CD40LG,CD5,CD6,CD69,CD7,CD79B,CD8A,DEF6,FASLG,FCRL3,ICOS,IRF1,IRF4,IRF8,KLRB1,KLRC4-KLRK1/KLRK1,KLRD1,KLRF1,LAX1,LCK,LYN,NCR3,NLRC3,NOD2,PIK3CD,PIK3CG,PLCG2,POU2AF1,PRF1,PRKCB,PTPRJ,RASGRP1,SH2D1A,SIRPG,SIT1,SLA2,SLAMF1,SPN,STAT4,TBC1D10C,TBX21,TIGIT,TLR4,TNFRSF13B,UNC13D,ZAP70	60
activation of leukocytes	5.8e-46	ARRB2,BTLA,CARD11,CCDC88B,CCL5,CCR7,CD2,CD226,CD244,CD247,CD27,CD3D,CD3E,CD3G,CD40LG,CD5,CD6,CD69,CD7,CD79B,CD8A,DEF6,FASLG,FCRL3,GNLY,ICOS,IL16,IRF1,IRF4,IRF8,KLRB1,KLRC4-KLRK1/KLRK1,KLRD1,KLRF1,LAX1,LCK,LTA,LTB,LYN,NCR3,NLRC3,NOD2,PIK3CD,PIK3CG,PLCG2,POU2AF1,PRF1,PRKCB,PRKCD,PTPRE,PTPRJ,RASGRP1,RHOH,SH2D1A,SIRPA,SIRPG,SIT1,SLA2,SLAMF1,SPN,STAT4,TBC1D10C,TBX21,TIGIT,TLR4,TNFRSF13B,UNC13D,ZAP70	68
activation of blood cells	5.57e-45	ARRB2,BTLA,CARD11,CCDC88B,CCL5,CCR7,CD2,CD226,CD244,CD247,CD27,CD3D,CD3E,CD3G,CD40LG,CD5,CD6,CD69,CD7,CD79B,CD8A,DEF6,FASLG,FCRL3,GNLY,ICOS,IL16,IRF1,IRF4,IRF8,KLRB1,KLRC4-KLRK1/KLRK1,KLRD1,KLRF1,LAX1,LCK,LTA,LTB,LYN,NCR3,NLRC3,NOD2,P2RX1,PIK3CD,PIK3CG,PLCG2,POU2AF1,PRF1,PRKCB,PRKCD,PTPRE,PTPRJ,RASGRP1,RHOH,SH2D1A,SIRPA,SIRPG,SIT1,SLA2,SLAMF1,SPN,STAT4,TBC1D10C,TBX21,TIGIT,TLR4,TNFRSF13B,UNC13D,Z…	69
quantity of mononuclear leukocytes	9.57e-45	BTLA,CARD11,CCL5,CCR4,CCR6,CCR7,CD244,CD247,CD27,CD3D,CD3E,CD3G,CD40LG,CD5,CD69,CD7,CD79B,CD8A,CD8B,DEF6,FASLG,FCMR,GNLY,ICOS,IGLL1/IGLL5,IKZF3,IL17RA,IRF1,IRF4,IRF8,JCHAIN,LCK,LTA,LTB,LY9,LYN,NLRC3,NOD2,PIK3AP1,PIK3CD,PIK3CG,PIM2,PLCG2,POU2AF1,POU2F2,PRF1,PRKCB,PRKCD,PTPRJ,RASGRP1,RASSF2,RASSF5,RHOH,SH2D1A,SIRPA,SIT1,SPN,STAT4,TBX21,TESPA1,THEMIS,TLR4,TNFRSF13B,TNFRSF17,TXK,UBASH3A,ZAP70	67
quantity of lymphocytes	1e-44	BTLA,CARD11,CCL5,CCR4,CCR6,CCR7,CD244,CD247,CD27,CD3D,CD3E,CD3G,CD40LG,CD5,CD69,CD7,CD79B,CD8A,CD8B,DEF6,FASLG,FCMR,GNLY,ICOS,IGLL1/IGLL5,IKZF3,IL17RA,IRF1,IRF4,IRF8,JCHAIN,LCK,LTA,LTB,LY9,LYN,NOD2,PIK3AP1,PIK3CD,PIK3CG,PIM2,PLCG2,POU2AF1,POU2F2,PRF1,PRKCB,PRKCD,PTPRJ,RASGRP1,RASSF2,RASSF5,RHOH,SH2D1A,SIRPA,SIT1,SPN,STAT4,TBX21,TESPA1,THEMIS,TLR4,TNFRSF13B,TNFRSF17,TXK,UBASH3A,ZAP70	66
activation of cells	1.01e-43	ARRB2,BTLA,CARD11,CCDC88B,CCL5,CCR6,CCR7,CD2,CD226,CD244,CD247,CD27,CD3D,CD3E,CD3G,CD40LG,CD5,CD6,CD69,CD7,CD79B,CD8A,CLEC12A,DEF6,FASLG,FCRL3,GNLY,ICOS,IL16,IRF1,IRF4,IRF8,KLRB1,KLRC4-KLRK1/KLRK1,KLRD1,KLRF1,LAX1,LCK,LTA,LTB,LYN,MAP4K1,NCR3,NLRC3,NOD2,P2RX1,PIK3CD,PIK3CG,PLCG2,POU2AF1,PRF1,PRKCB,PRKCD,PTPRE,PTPRJ,RASGRP1,RHOH,SH2D1A,SIRPA,SIRPG,SIT1,SLA2,SLAMF1,SLC24A4,SPN,STAT4,STXBP2,TBC1D10C,…	76
function of leukocytes	6.5e-43	ADGRE1,ALOX5,ARRB2,BTLA,CARD11,CCL5,CCR6,CCR7,CD244,CD247,CD27,CD3E,CD3G,CD40LG,CD69,CD8A,CD8B,CLEC12A,F11R,FCMR,ICOS,IL16,IRF1,IRF4,IRF8,JCHAIN,KLRB1,KLRC4-KLRK1/KLRK1,LAX1,LTA,LTB,LY75,LYN,MAP4K1,NLRP3,NOD2,PIK3CD,PIK3CG,PLCG2,POU2AF1,PRF1,PRKCD,PTPRCAP,PTPRJ,RASGRP1,RASSF5,SH2D1A,SH2D1B,SIRPA,SLA2,SLAMF1,SPN,STAT4,TBC1D10C,TBX21,TIGIT,TLR4,TXK	58
cell proliferation of T lymphocytes	3.66e-40	ACPP,BTLA,CARD11,CCDC88B,CCL5,CCR6,CCR7,CD2,CD226,CD244,CD247,CD27,CD3E,CD3G,CD40LG,CD5,CD6,CD69,CD8A,DEF6,EOMES,FASLG,GPR174,ICOS,IKZF3,IRF1,IRF4,IRF8,KLRB1,KLRC4-KLRK1/KLRK1,KLRD1,LCK,LY9,MAP4K1,PIK3CD,PIK3CG,PIM2,PRF1,PTPRCAP,PTPRJ,RASGRP1,RASSF5,RHOH,SH2D1A,SIT1,SKAP1,SLAMF1,SPN,STAT4,TBC1D10C,TBX21,TESPA1,THEMIS,TIGIT,TLR4,TMIGD2,TXK,UBASH3A,ZAP70	59
