# Supplementary material for: Comparative Transcriptome Analysis Quantifies Immune Cell Transcript Levels, Metastatic Progression, and Survival in Osteosarcoma
Source: Oxford University Press journal article supplement (doi:10.1158/0008-5472.can-17-0576), 2017-10-24
Supplement: 00085472can170576-sup-179131_3_supp_4323419_mxs87j.xlsx [file 00085472can170576-sup-179131_3_supp_4323419_mxs87j.xlsx]

## Sheet: Human Mapping
samplename	#reads	medianreadqualityr1	medianreadqualityr2	lastq30baser1	lastq30baser2	lastq20baser1	lastq20baser2	%alignedreads	%concordant	estimatedinsertmean	insertmean	estimatedinsertstddev	insertstddev	#expressedgenes
HO002M	43670764	37.4	37.5	100	101	101	101	93.3	86.3	235	228.67	66	47.52	19599
HO003	48568711	37.3	37.5	100	101	101	101	93.1	86	232	226.97	62	46.7	19302
HO004	41580851	37.3	37.4	100	101	101	101	92.9	84.9	232	226.6	66	48.14	18970
HO009	44576857	37.3	37.5	100	101	101	101	92.8	85.7	233	226.82	65	47.56	19043
HO010	42568885	37.3	37.4	100	101	101	101	93.4	85.2	235	227.95	66	47.15	19178
HO012	45049991	37.3	37.4	100	101	101	101	93.2	86.3	233	228.12	66	47.34	19405
HO014	43271150	37.2	37.3	100	101	101	101	93.2	86.5	239	232.68	69	47.23	18659
HO015	43048700	37.2	37.4	100	101	101	101	93.4	86.6	239	231.04	68	47.97	18775
HO016	33153897	37.3	37.5	100	101	101	101	93.3	85.6	239	232.8	69	49.1	18630
HO018	36067107	37.3	37.5	100	101	101	101	92.6	85.3	236	231.35	62	48.78	19254
HO019	39974977	37.3	37.5	100	101	101	101	93.2	86.1	236	232.3	58	48.31	19329
HO021U	35960435	37.4	37.5	100	101	101	101	92.8	84.7	243	237.74	62	47.12	19340
HO022U	38654182	37.3	37.5	100	101	101	101	92.8	84.4	238	233.05	63	48.81	19927
HO025U	40282758	37.4	37.5	100	101	101	101	93.2	85.3	241	236.39	61	48.55	19251
HO028	38371300	37.3	37.4	100	101	101	101	92.8	85.4	239	234.81	64	49.34	18929
HO030	29591957	37.3	37.5	100	101	101	101	92.9	82.3	231	224.72	62	48.79	18313
HO031	43694442	37.2	37.4	100	101	101	101	93.2	86.4	210	206.19	62	47.77	19626
HO032	43921436	37.4	37.6	100	101	101	101	93.2	86.3	207	204	61	47.92	19426
HO033	50759238	37.3	37.6	100	101	101	101	93.8	86.9	208	204.41	61	47.38	19399
HO034	40588558	37.3	37.5	100	101	101	101	93.4	86.6	209	205.19	62	47.59	19309
HO036	47306987	37.5	37.6	100	101	101	101	93.3	86	207	203.9	59	47.38	19663
HO038	39698321	37.3	37.5	100	101	101	101	93	85.9	208	203.9	62	47.84	19524
HO039U	40775709	37.3	37.6	100	101	101	101	93.4	86.8	209	205.29	63	47.83	18968
HO040U	41896440	37.4	37.6	100	101	101	101	93.9	87	209	205.61	62	47.62	18520
HO041U	46738921	37	37.2	100	101	101	101	93.2	85.7	201	200.12	38	31.12	19033
HO042U	49863695	37.1	37.3	100	101	101	101	93.1	86.3	203	202.61	37	30.89	20184
HO043M	45662795	37.1	37.3	100	101	101	101	93.1	85.4	201	200.04	38	31.68	19730
HO044M	46700944	37.1	37.3	100	101	101	101	93.1	85.3	201	200.2	39	31.64	19473
HO045	48464798	37.1	37.3	100	101	101	101	92.8	85.7	201	200.06	36	30.83	19315
HO046M	45446524	37	37.3	100	101	101	101	93.3	85.8	202	201.12	39	31.19	19288
HO047M	52728422	37	37.3	100	101	101	101	92.8	85.1	202	201.31	38	30.85	19434
HO052M	42423638	37	37.2	100	101	101	101	92.8	85.8	203	201.07	40	32.5	19358
HO055M	48708073	36.8	36.8	75	100	101	101	91.8	84.1	188	187.78	31	25.91	19640
HO056M	41954104	36.9	37	75	100	101	101	91.7	84.5	188	187.97	30	25.92	19979
HO057	48665887	36.9	37	75	100	101	101	92.3	84.8	185	185.62	30	25.78	19690
HO058M	57681241	36.8	36.8	75	100	101	101	91.7	83.5	193	192.35	29	24.64	20071
HO059	49008596	36.7	36.7	75	100	101	101	91.6	84.2	186	186.31	31	26.22	20102
HO060	42338227	36.7	36.8	75	100	101	101	91.8	83	189	188.93	31	25.09	18971
HO062	56784839	36.7	36.8	75	100	101	101	91.5	83.8	188	188.22	30	24.92	19423
HO063	43873923	36.8	36.8	75	100	101	101	92	84.6	186	186.1	31	26.02	19317
HO064U	65786873	35.8	36	75	100	101	101	89.8	81.6	182	182.39	30	25.04	20073
HO065U	52333619	36	36.1	75	100	101	101	89.7	81.6	182	181.78	29	25.1	20167
HO066U	54911560	36	36.1	75	100	101	101	90.8	83.1	183	182.35	30	25.06	19078
HO068U	49837984	35.9	36.1	75	100	101	101	90.1	82.1	182	181.99	31	25.18	18809
HO069B	54017172	36.1	36.2	75	100	101	101	89.8	81.4	181	180.71	29	25.11	20223
HO070B	63294014	36.1	36.3	75	100	101	101	91	83.2	182	182.29	28	24.63	19581
HO071B	55850606	36	36.2	75	100	101	101	90.4	81.9	183	182.87	30	25.44	19240
HO072C	47296607	36.1	36.2	75	100	101	101	90.5	81.9	184	183.24	30	25.18	19322
HO073C	45516814	36.1	36.2	75	100	101	101	89.3	79.8	183	181.9	30	25.76	18793
HO074C	48257367	36.1	36.1	75	100	101	101	90.3	81.6	183	182.78	29	25.73	19970
HO075C	54339119	36.1	36.2	75	100	101	101	89.4	81.1	183	182.77	30	25.27	18936
HO076C	51414716	36.1	36.2	75	100	101	101	89.3	79.4	184	183.01	30	25.07	18249
Mean	4.62103e+07	36.8	37	90.3	100.6	101	101	92.2	84.5	206.8	204.8	46.6	36.9	19342
samplename	#reads	medianreadqualityr1	medianreadqualityr2	lastq30baser1	lastq30baser2	lastq20baser1	lastq20baser2	%alignedreads	%concordant	estimatedinsertmean	insertmean	estimatedinsertstddev	insertstddev	#expressedgenes
HOSJ001	49590553	37.7	37.7	101	101	101	101	90.9	84.2	180	180.29	58	54.5	19111
HOSJ002	49590553	37.7	37.7	101	101	101	101	90.9	84.2	180	180.29	58	54.5	19111
HOSJ003	33514769	37.8	37.7	101	101	101	101	90.4	82.7	180	180.77	60	56.56	19031
HOSJ004	33514769	37.7	37.8	101	101	101	101	90.4	82.7	180	180.77	60	56.54	19030
HOSJ005	49875554	37.6	37.7	101	101	101	101	90.5	83.1	186	186.04	65	61.13	19015
HOSJ006	48643253	37.9	38	101	101	101	101	90.7	83.3	181	181.16	60	56.74	19332
HOSJ007	33343211	37.6	37.7	101	101	101	101	91.5	83.3	185	185.01	62	57.28	18103
HOSJ008	67108903	37.7	37.8	101	101	101	101	90.9	83.9	183	182.93	61	57.92	19618
HOSJ009	22007948	37.9	38	101	101	101	101	89.8	81.3	182	183.51	63	61.62	17748
HOSJ010	47945874	38	38	101	101	101	101	91.3	84.3	186	187.58	65	62.83	19127
HOSJ011	17776180	38.2	38.3	101	101	101	101	91.2	83.7	189	189.8	66	62.2	18189
HOSJ012	22710555	37.7	37.8	101	101	101	101	90.1	82.9	176	175.62	56	53.64	18760
HOSJ013	50524406	37.9	38	101	101	101	101	90.9	83.7	188	187.14	64	59.85	19467
HOSJ014	18219195	38.2	38.2	101	101	101	101	90.6	83.3	184	183.72	63	59.5	18508
HOSJ015	63732813	37	35.5	101	98	101	101	85.1	71.7	178	178.3	52	48.86	17628
HOSJ016	46541549	36.8	35	101	95	101	101	82.4	70.2	172	172.64	52	49.84	17975
HOSJ017	29211007	37.6	37.7	101	101	101	101	89.3	80.3	171	172.08	50	48.67	17974
HOSJ018	31934443	37.9	38	101	101	101	101	90.6	83.8	176	175.34	56	54.44	19054
HOSJ019	44472113	37.8	37.9	101	101	101	101	91.4	84.2	177	178.04	55	53.38	19082
HOSJ020	31734303	37.9	38	101	101	101	101	89.3	81.5	189	190.59	69	67.55	19081
HOSJ021	45087833	36.6	34.7	101	95	101	100	84.5	72.5	191	188.95	62	54.35	19218
HOSJ022	39183070	38.1	38.1	101	101	101	101	91.3	84.8	175	175.46	55	52.71	18842
HOSJ023	49973235	36.6	34.7	101	95	101	100	84.5	72.6	190	188.7	60	54.36	18853
HOSJ024	53017975	36.6	34.8	101	96	101	101	85	72.8	200	196.31	61	53.91	18816
HOSJ025	52855076	36.6	34.8	101	95	101	100	85.2	72.9	192	189.42	60	53.87	19284
HOBZ01	83202028	36.9	35.8	76	76	76	76	86	74.4	212	undef	68	undef	18638
HOBZ02	86765527	36.6	35.2	76	76	76	76	84.7	73.4	250	undef	65	undef	18328
HOBZ03	93138393	36.4	35.3	76	76	76	76	82.8	71.4	204	undef	64	undef	18054
HOBZ05	26092969	33.2	18.9	66	0	69	23	22.3	17.5	212	undef	87	undef	16914
HOBZ06	68445715	33.3	22.5	66	0	71	41	32.7	27.8	187	undef	60	undef	17297
HOBZ07	117836240	35.9	34	75	75	76	76	68.8	59.7	183	undef	56	undef	16867
HOBZ08	97956458	36.5	35.3	76	76	76	76	82.7	71.8	222	undef	68	undef	18933
HOBZ09	12628520	36	34	76	75	76	76	70.1	60.7	252	undef	89	undef	15040
HOBZ10	87680843	36.7	35.4	76	76	76	76	84.3	73.3	241	undef	77	undef	19321
HOBZ11	101790618	36.8	35.5	76	76	76	76	85.4	74	257	undef	79	undef	19056
HOBZ13	85215007	36.7	35.4	76	76	76	76	81.5	70.9	224	undef	70	undef	17471
HOBZ14	92544497	36.9	35.7	76	76	76	76	86.3	75.5	250	undef	72	undef	18520
HOBZ15	63574179	36.5	35.1	76	76	76	76	76.9	66.4	220	undef	69	undef	16991
HOBZ16	86598211	36.6	35.3	76	76	76	76	82.8	71.5	238	undef	69	undef	18401
HOBZ17	92738028	36.7	35.5	76	76	76	76	84.1	73.3	250	undef	65	undef	18290
HOBZ19	111667119	36.1	34.8	76	76	76	76	74.5	64.8	147	undef	37	undef	18461
HOBZ20	90085917	36.7	35.4	76	76	76	76	83.9	72.8	246	undef	72	undef	18715
HOBZ21	103374018	36.7	35.3	76	76	76	76	84.8	73.1	213	undef	68	undef	18990
HOBZ22	94241148	36.7	35.3	76	76	76	76	82.3	70.6	268	undef	79	undef	18343
HOBZ23	98463884	36.6	35.4	76	76	76	76	83.4	73.2	225	undef	67	undef	19343
HOBZ24	87894524	35.7	32.7	75	75	76	76	64.7	56	220	undef	77	undef	18647
HOBZ25	125037695	36.7	35.4	76	76	76	76	82.9	72.7	235	undef	76	undef	19440
HOBZ27	70508908	36.1	33.8	76	75	76	76	71.5	62.1	237	undef	73	undef	18307
HOBZ28	92382500	36.7	35.7	76	76	76	76	84.7	73.4	204	undef	59	undef	16699
HOBZ29	85652825	36.2	34.6	76	75	76	76	83.9	73.4	256	undef	74	undef	17626
HOBZ30	107450738	36.4	35.2	76	76	76	76	79.8	69.2	230	undef	61	undef	18676
HOBZ31	94132563	36.7	35.5	76	76	76	76	84.7	73.8	234	undef	66	undef	18616
HOBZ32	100774260	36	34	76	75	76	76	75.1	65.6	210	undef	68	undef	18675
HOBZ33	86337401	36.6	35.4	76	76	76	76	85.4	74.3	233	undef	70	undef	18947
HOBZ34	88947839	36.9	35.7	76	76	76	76	86.2	75.3	250	undef	78	undef	18396
HOBZ35	114263575	36.6	35.5	76	76	76	76	83.4	72.6	236	undef	69	undef	17341
HOBZ36	97840066	36.7	35.6	76	76	76	76	84.7	74	210	undef	72	undef	19134
HOBZ37	70950119	36.4	34.5	76	76	76	76	78.1	67.4	219	undef	71	undef	18501
HOBZ38	61280599	36.6	35.2	76	76	76	76	83.6	71.9	255	undef	73	undef	18349
HOBZ39	100063011	36.7	35.8	76	76	76	76	86.3	75.7	204	undef	66	undef	18644

## Sheet: Dog_Mapping
runname	samplename	#reads	#filteredreads	medianreadqualityr1	medianreadqualityr2	lastq30baser1	lastq30baser2	lastq20baser1	lastq20baser2	%alignedreads	%concordant	%spike	estimatedinsertmean	insertmean	estimatedinsertstddev	insertstddev	#expressedgenes
dog032715	CNOB	64306200	undef	35.5	35.6	75	100	101	101	84.6	72.7	undef	187	186.05	29	21.74	17109
dog032715	DOS.100	53977706	undef	37	36.7	101	101	101	101	91.7	84.1	undef	182	182.18	31	26.27	20643
dog032715	DOS.101	54391992	undef	37	36.7	101	101	101	101	91.1	82.8	undef	187	186.47	37	31.04	19424
dog032715	DOS.105	55127635	undef	36.9	36.6	101	101	101	101	91.1	83.4	undef	185	184.53	38	30.94	20366
dog032715	DOS.11	53226022	undef	37.2	37	101	101	101	101	92	84.2	undef	197	195.96	41	33.96	21014
dog032715	DOS.110	66964021	undef	37	36.8	101	101	101	101	91.7	84.6	undef	182	182.25	30	26.29	20570
dog032715	DOS.111	52205276	undef	37.1	36.9	101	101	101	101	91.8	84.6	undef	182	182.57	30	26.27	20865
dog032715	DOS.112	60320552	undef	36.9	36.7	101	101	101	101	91.6	83.1	undef	184	182.91	36	30.68	19691
dog032715	DOS.113	41383541	undef	37	36.9	101	101	101	101	87.9	78.8	undef	186	185.4	33	30.32	21421
dog032715	DOS.114	66549125	undef	37.1	36.9	101	101	101	101	92.1	84.6	undef	180	180.95	31	26.31	20068
dog032715	DOS.115	54708573	undef	36.7	36.5	101	101	101	101	90.4	83.4	undef	183	182.12	33	26.75	19782
dog032715	DOS.116	52240910	undef	36.8	36.7	101	101	101	101	90.6	81.7	undef	190	188.86	35	29.17	20789
dog032715	DOS.24	58810402	undef	37	37	101	101	101	101	91.1	82.1	undef	188	188.52	33	29.07	19985
dog032715	DOS.28	52385020	undef	37.1	36.9	101	101	101	101	91.8	84.2	undef	199	197.32	42	33.42	19107
dog032715	DOS.32	53668945	undef	36.2	35.9	101	101	101	101	89.4	80.6	undef	184	183.69	34	28.03	20618
dog032715	DOS.37	50696378	undef	37.1	36.9	101	101	101	101	91.7	84.1	undef	200	198.19	43	33.41	20038
dog032715	DOS.46	49409333	undef	37.2	36.9	101	101	101	101	92	84.5	undef	199	197.51	42	33.41	20123
dog032715	DOS.46.2	64503163	undef	36	36.3	75	100	101	101	86.8	76.2	undef	184	184.52	25	21.04	20317
dog032715	DOS.56	64833807	undef	36.4	36.2	101	101	101	101	89.3	79.6	undef	183	182.72	32	28.01	20421
dog032715	DOS.57	65280542	undef	36.5	36.2	101	101	101	101	89.8	79	undef	183	183.18	32	27.98	19602
dog032715	DOS.6	59209271	undef	37.2	37	101	101	101	101	90.1	81.1	undef	199	197.56	39	33.11	21372
dog032715	DOS.6M	60071800	undef	37.2	37	101	101	101	101	90.6	81	undef	200	197.52	40	34.1	21935
dog032715	DOS.70	61356718	undef	36.9	36.6	101	101	101	101	90.5	82.6	undef	186	185.94	38	31	20785
dog032715	DOS.73	52594998	undef	36.9	36.6	101	101	101	101	91	83.1	undef	188	187.66	39	31.3	20260
dog032715	DOS.75	54822128	undef	36.8	36.5	101	101	101	101	89.6	81.4	undef	188	187.59	37	30.84	19778
dog032715	DOS.76	60139505	undef	36.9	36.9	101	101	101	101	89.9	81	undef	188	188.82	34	29.94	22086
dog032715	DOS.78	60327528	undef	36.9	36.7	101	101	101	101	91.1	82.8	undef	187	186.46	36	30.65	20899
dog032715	DOS.8	57341149	undef	37.1	37.1	101	101	101	101	91.3	82.2	undef	188	187.79	33	29.31	20792
dog032715	DOS.81	63547174	undef	36.3	36	101	101	101	101	89.1	80.6	undef	186	185.1	33	28.18	20486
dog032715	DOS.84	52685831	undef	36.3	36	101	101	101	101	89.5	80.7	undef	186	185.33	34	28.44	19959
dog032715	DOS.85	62726507	undef	36.5	36.2	101	101	101	101	89.7	80	undef	184	184.06	33	28.58	20020
dog032715	DOS.90	47402650	undef	36.2	35.8	101	101	101	101	88.6	79.9	undef	185	183.86	36	29.49	20054
dog032715	OSCA.78	58519560	undef	36.8	36.5	101	101	101	101	90.7	82.7	undef	184	183.08	33	26.58	19010
dog032715	OSCA.8	56169762	undef	36.8	36.8	101	101	101	101	90.8	81.4	undef	190	189.03	36	29.51	18655
dog032715	Mean	5.71422e+07	undef	36.7	36.5	98.8	100.2	101	101	90.2	79.6	undef	196.3	185.2	39.1	29.2	20208.1

## Sheet: Mouse Mapping
runname	samplename	#reads	#filteredreads	medianreadqualityr1	medianreadqualityr2	lastq30baser1	lastq30baser2	lastq20baser1	lastq20baser2	%alignedreads	%concordant	%spike	estimatedinsertmean	insertmean	estimatedinsertstddev	insertstddev	#expressedgenes
mouse-052615	MO103-1	25478174	undef	38.6	38.5	51	51	51	51	94.5	87.2	undef	191	183.24	51	34.03	17336
mouse-052615	MO103-2	54815178	undef	38.7	38.6	51	51	51	51	94.5	87.2	undef	191	187.16	48	31.46	18309
mouse-052615	MO112	24349230	undef	39.5	39.4	51	51	51	51	97.1	90.5	undef	191	183.04	48	29.3	17052
mouse-052615	MO113	20039970	undef	39.1	39.4	51	51	51	51	94.9	88.7	undef	192	186.63	41	27.21	17131
mouse-052615	MO113C	19011337	undef	39.3	39.3	51	51	51	51	95.6	89.8	undef	205	193.57	58	35.33	15962
mouse-052615	MO142	34264775	undef	39.4	39.3	51	51	51	51	96.2	90.8	undef	185	180.08	39	27.36	17837
mouse-052615	MO155	22913015	undef	38.6	38.5	51	51	51	51	94.3	87.6	undef	196	187.55	51	34.13	17254
mouse-052615	MO163	19332854	undef	39.4	39.3	51	51	51	51	96.7	91.7	undef	194	185.12	50	30.15	17559
mouse-052615	MO165C	20851755	undef	39.1	38.9	51	51	51	51	86.8	75.4	undef	198	192.75	46	35.16	15323
mouse-052615	MO167	24648109	undef	38.4	38.4	51	51	51	51	79.6	63.2	undef	180	178.45	29	24.46	17659
mouse-052615	MO171	16269199	undef	39.4	39.3	51	51	51	51	96.1	91.1	undef	187	179.5	44	26.88	16743
mouse-052615	MO202	26008421	undef	38.9	38.8	51	51	51	51	90.7	81.5	undef	180	176.12	35	26.26	17104
mouse-052615	MO203	23362496	undef	38.7	38.6	51	51	51	51	92.5	84.3	undef	197	192.01	39	28.19	16870
mouse-052615	MO209	26088810	undef	38.9	38.7	51	51	51	51	95.1	88.8	undef	195	187.14	46	30.61	17397
mouse-052615	MO218	24157559	undef	39.1	39.1	51	51	51	51	93.2	85.9	undef	184	178.27	39	25.53	17283
mouse-052615	MO219	24726728	undef	39.1	39	51	51	51	51	96	90.2	undef	181	176.24	39	27.11	17365
mouse-052615	MO220-1	21805933	undef	39.3	39.2	51	51	51	51	95.7	89.4	undef	191	184.24	46	29.97	17555
mouse-052615	MO220-2	15173077	undef	38.7	38.5	51	51	51	51	83.8	68	undef	187	184.71	36	29.37	16774
mouse-052615	MO224	26252205	undef	39.1	38.9	51	51	51	51	94.1	87.6	undef	180	176.01	37	26.29	17210
mouse-052615	MO228-1	45642391	undef	39	38.9	51	51	51	51	94.5	87.9	undef	194	190.09	44	32.73	17744
mouse-052615	MO228-2	22993673	undef	38.8	38.6	51	51	51	51	94.6	88.2	undef	200	191.66	46	28.17	16892
mouse-052615	MO229	26583568	undef	39.2	39.4	51	51	51	51	93.8	86.1	undef	188	185.42	35	27.57	17731
mouse-052615	MO230	20280983	undef	39.4	39.4	51	51	51	51	96.8	92.7	undef	192	185.93	45	30.99	16875
mouse-052615	MO236	31846938	undef	39.4	39.3	51	51	51	51	95.3	89.8	undef	194	184.75	51	31.27	17983
mouse-052615	MO237	18570367	undef	39.2	39.4	51	51	51	51	94.5	88	undef	190	185.9	38	27.58	17100
mouse-052615	MO243	23919480	undef	39	38.9	51	51	51	51	94.1	87.4	undef	197	190.73	43	28.59	17752
mouse-052615	MO248	26009078	undef	39.2	39.1	51	51	51	51	97	92.4	undef	182	177.52	38	27.15	17577
mouse-052615	MO270	22798846	undef	39.4	39.3	51	51	51	51	95.8	90.4	undef	204	195.92	54	35.13	17462
mouse-052615	MO272	27008449	undef	39.4	39.4	51	51	51	51	96.3	90.9	undef	191	184.84	43	29.93	17258
mouse-052615	MO274	23189447	undef	39.2	39.2	51	51	51	51	95.1	88.6	undef	183	180.13	34	25.3	16989
mouse-052615	MO281	17084254	undef	39.4	39.2	51	51	51	51	95.1	88.7	undef	182	177.58	39	26.72	15963
mouse-052615	MO282	17443423	undef	39.4	39.3	51	51	51	51	96.4	91.5	undef	183	177.69	40	26.11	16933
mouse-052615	MO290	19079966	undef	39.4	39.3	51	51	51	51	96.5	91.7	undef	212	197.07	64	35.34	16293
mouse-052615	MO298	25153404	undef	39.4	39.4	51	51	51	51	96.7	92.2	undef	196	186.65	50	30.81	17824
mouse-052615	MO302	28516383	undef	39	38.9	51	51	51	51	93.5	86.5	undef	179	174.64	37	26.52	17510
mouse-052615	MO304-1	29298250	undef	39.1	39	51	51	51	51	97.1	92.7	undef	182	177.2	39	26.36	17733
mouse-052615	MO304-2	19425433	undef	39.4	39.3	51	51	51	51	96.4	89.3	undef	193	186.33	46	30.33	17326
mouse-052615	MO310	20829269	undef	39.4	39.3	51	51	51	51	96.2	91.4	undef	210	195.81	63	35.15	17090
mouse-052615	MO311	21058115	undef	39.4	39.3	51	51	51	51	95.9	90.4	undef	206	193.78	60	34.97	16748
mouse-052615	MO311-1C	15062676	undef	39.4	39.3	51	51	51	51	96.4	92.2	undef	194	186.74	47	31.67	16878
mouse-052615	MO311MC	21084674	undef	39.5	39.4	51	51	51	51	97	93	undef	195	187.44	49	30.59	16900
mouse-052615	MO313	19189712	undef	39.4	39.3	51	51	51	51	95.9	90.8	undef	182	176.5	41	27.07	17647
mouse-052615	MO314	20470164	undef	39.2	39.1	51	51	51	51	96.7	90.8	undef	181	175.53	40	26.21	16884
mouse-052615	MO315	18381499	undef	39.4	39.3	51	51	51	51	96.1	91.3	undef	196	185.06	53	30.1	17050
mouse-052615	MO315C	23642341	undef	39.1	39	51	51	51	51	96.5	91.9	undef	183	176.4	42	26.59	17318
mouse-052615	MO315MC	16144010	undef	39.5	39.4	51	51	51	51	96.8	92.3	undef	195	187.1	49	31.98	16089
mouse-052615	MO320	21505105	undef	39.3	39.2	51	51	51	51	92.3	83.9	undef	180	176.53	34	26.86	16004
mouse-052615	MO326	15146435	undef	39.4	39.3	51	51	51	51	96.2	91.5	undef	183	178.49	40	26.81	17729
mouse-052615	MO336	24478951	undef	38.8	38.6	51	51	51	51	94.6	87.7	undef	195	188.43	44	30.84	16547
mouse-052615	MO343	25835514	undef	39.4	39.3	51	51	51	51	96.5	91.8	undef	186	179.97	43	27.09	17370
mouse-052615	MO347	22669382	undef	39.2	39.2	51	51	51	51	95.5	89.5	undef	184	179.36	35	24.94	17029
mouse-052615	MO359-1	19405740	undef	39.4	39.3	51	51	51	51	95.8	90.3	undef	183	178.78	38	26.65	17188
mouse-052615	MO359-2	23809729	undef	39.3	39.1	51	51	51	51	92.4	84.9	undef	183	178.73	37	26.26	17354
mouse-052615	MO360-1	24143552	undef	39.2	39.1	51	51	51	51	95	88.8	undef	187	182.47	36	24.59	17008
mouse-052615	MO360-2	20403304	undef	39.2	39.2	51	51	51	51	95.3	89.3	undef	187	182.09	36	24.97	16981
mouse-052615	MO363	22990325	undef	38.8	38.6	51	51	51	51	94.7	88.3	undef	195	187.61	46	30.04	17631
mouse-052615	MO370	21171729	undef	39	38.9	51	51	51	51	94.7	87.8	undef	197	190.94	42	28.54	17065
mouse-052615	MO374-1	30993920	undef	39.4	39.3	51	51	51	51	95.6	89.5	undef	184	178.91	38	27.76	17665
mouse-052615	MO374-2	15688769	undef	39.4	39.3	51	51	51	51	96.1	90.9	undef	183	179.12	38	27.99	16736
mouse-052615	MO374-3	19493527	undef	39.4	39.3	51	51	51	51	96.2	90.4	undef	185	179.57	41	29.06	16812
mouse-052615	MO376	22032350	undef	39.4	39.3	51	51	51	51	94.7	88.9	undef	183	178.72	38	27.22	17540
mouse-052615	MO379	26681996	undef	39.1	39	51	51	51	51	95.1	89.7	undef	180	175.79	38	26.14	17347
mouse-052615	MO380	20171120	undef	39.4	39.3	51	51	51	51	96.2	91.2	undef	205	195.47	57	36.41	17560
mouse-052615	MO385	27085876	undef	38.7	38.6	51	51	51	51	93.4	86.2	undef	194	187.58	44	29.94	17001
mouse-052615	MO392	28633756	undef	39.4	39.3	51	51	51	51	95.7	88.3	undef	182	177.52	36	26.87	18243
mouse-052615	MO399-1	19716279	undef	39.2	39.1	51	51	51	51	94.9	88.5	undef	188	182.08	39	25.19	16337
mouse-052615	MO399-2	21711143	undef	39.2	39.2	51	51	51	51	95	88.9	undef	187	182.25	37	24.91	17551
mouse-052615	MO399C	21554967	undef	39.4	39.3	51	51	51	51	95.5	89.8	undef	205	193.6	58	35.65	16007
mouse-052615	MO404-1	21045076	undef	39.1	39	51	51	51	51	96.5	91.8	undef	180	175.57	38	26.61	17506
mouse-052615	MO404-2	23381264	undef	39.2	39.1	51	51	51	51	97.1	92.5	undef	180	175.69	38	26.68	17846
mouse-052615	MO410	21034535	undef	39.4	39.3	51	51	51	51	95.8	90.4	undef	206	195.19	56	34.92	16469
mouse-052615	MO410C	17962217	undef	39.4	39.4	51	51	51	51	96.9	92.9	undef	195	186.2	50	30.87	16120
mouse-052615	MO411	25096460	undef	39.4	39.4	51	51	51	51	96.9	91.7	undef	203	195.18	51	34.73	17866
mouse-052615	MO425	22611452	undef	38.8	38.7	51	51	51	51	94.1	86.5	undef	196	190.82	41	28.38	17540
mouse-052615	MO429	23237211	undef	39.4	39.3	51	51	51	51	95.7	90.7	undef	194	185.37	49	30.13	17332
mouse-052615	MO430	16887042	undef	39.3	39.1	51	51	51	51	93.1	85.7	undef	191	183.64	47	31.06	17447
mouse-052615	MO44	21253253	undef	39.4	39.3	51	51	51	51	96.5	90.2	undef	204	193.13	59	34.91	17349
mouse-052615	MO441	14895778	undef	39.1	39	51	51	51	51	96.6	92	undef	183	177.69	41	26.94	16684
mouse-052615	MO445	22094550	undef	39.4	39.4	51	51	51	51	96.4	90.8	undef	206	197.97	53	35.13	17375
mouse-052615	MO45	23874680	undef	38.6	38.6	51	51	51	51	94.9	88.6	undef	195	185.71	53	33.69	17209
mouse-052615	MO457	23889282	undef	39.1	39	51	51	51	51	95.5	90.1	undef	180	175.52	37	27.09	17254
mouse-052615	MO464	21689564	undef	38.6	38.6	51	51	51	51	95.2	88.5	undef	195	188.01	49	34	17679
mouse-052615	MO504-1	26019504	undef	38.8	38.6	51	51	51	51	94.8	88.1	undef	193	187.48	44	30.09	17678
mouse-052615	MO504-2	48361060	undef	39.1	38.9	51	51	51	51	94	87.4	undef	202	190.11	55	33.27	17864
mouse-052615	MO507	22041837	undef	39.1	39	51	51	51	51	96.4	91.3	undef	180	175.36	38	26.99	17436
mouse-052615	MO519	24223005	undef	39.2	39.1	51	51	51	51	96.2	90.3	undef	179	174.41	36	26.41	17545
mouse-052615	MO520-1	18245586	undef	39.4	39.3	51	51	51	51	96.1	89.9	undef	207	196.97	56	35.21	17204
mouse-052615	MO57	43101087	undef	39.2	39.3	51	51	51	51	94.8	88.4	undef	182	181.87	38	27.9	17818
mouse-052615	MO60-1	20616187	undef	39.2	39.4	51	51	51	51	95	88.4	undef	189	185.58	36	27.48	17468
mouse-052615	MO60-2	20903139	undef	39.4	39.3	51	51	51	51	96.3	88.7	undef	187	179.43	43	26.77	17435
mouse-052615	MO60C	19202256	undef	39.4	39.3	51	51	51	51	95.6	89.8	undef	204	193.5	56	35.17	15770
mouse-052615	MO63	28081177	undef	38.8	38.7	51	51	51	51	94.4	87.9	undef	195	190.94	38	28.26	17822
mouse-052615	MO67	23858378	undef	38.6	38.5	51	51	51	51	94.5	88.1	undef	194	187.29	49	33.86	16875
mouse-052615	MO68	31820459	undef	39.4	39.3	51	51	51	51	95.7	90.2	undef	192	185.79	45	30.43	17596
mouse-052615	MO69	25519128	undef	38.5	38.4	51	51	51	51	93.8	86.9	undef	194	184.92	52	33.57	17299
mouse-052615	MO82	23771884	undef	39.3	39.3	51	51	51	51	94.7	88.1	undef	205	196.62	54	35.01	16843
mouse-052615	MO82C	18634889	undef	39.2	39.1	51	51	51	51	96.5	84.2	undef	179	175.64	36	28.33	16869
mouse-052615	MO82MC	19556347	undef	39.1	39	51	51	51	51	95.5	85.1	undef	179	175.71	36	28.06	16928
mouse-052615	MO87-1	21771019	undef	39.2	39.4	51	51	51	51	95.6	89.5	undef	193	186.07	43	27.84	17481
mouse-052615	MO87-5	31330019	undef	38.6	38.6	51	51	51	51	95.4	89.2	undef	195	187.1	49	33.73	17971
mouse-052615	MO88	24384062	undef	38.8	38.7	51	51	51	51	94.8	88.5	undef	194	190.03	40	29.81	16979
mouse-052615	MO89	17243785	undef	39.1	39.4	51	51	51	51	95.3	88.8	undef	191	187.79	36	28.02	16993
mouse-052615	MO91	17738212	undef	39.2	39.4	51	51	51	51	95.5	89.3	undef	191	186.82	38	27.06	16432
mouse-052615	Mean	2.34592e+07	undef	39.1	39	51	51	51	51	95	88.6	undef	190.9	184.6	43.8	29.5	17187.5
