# Supplementary material for: Comparative Transcriptome Analysis Quantifies Immune Cell Transcript Levels, Metastatic Progression, and Survival in Osteosarcoma
Source: Oxford University Press journal article supplement (doi:10.1158/0008-5472.can-17-0576), 2017-10-24
Supplement: 00085472can170576-sup-179131_3_supp_4323421_1xs87j.xlsx [file 00085472can170576-sup-179131_3_supp_4323421_1xs87j.xlsx]

## Sheet: lists
Systematic Name	Annotation	Genes
HOS-1	Immune-1	OSM	RAB20	P2RY6	CCL8	CCL4	CCL3	PSMB10	PTPLAD2	B3GALT4	CD28	SAT1	STAT5A	GBP2	CYBA	ODF3B	TYMP	RENBP	VAMP8	LMO2	CRTAM	SLC2A9	CYSLTR1	ITM2A	TCN2	IL2RA	N4BP2L1	TMEM176B	TMEM176A	ATP8B4	FES	FAM26F	CXCR2P1	ACRBP	CASP10	APOL3	CCRL2	ACSL5	KCNJ5	PIK3R6	GRAP	CXCR4	RIPK3	TNFSF10	GBP4	KCNE3	HVCN1	PLB1	IGFLR1
HOS-2		NCR1	PI3	NLRP6	CR2	CLEC4C	TIGD3	SLC25A37	RUNDC3A	HBQ1	GP6	TMEM40	PDZK1IP1	BCL2A1	BST1	RAB44	KRT1	ABCC13	HCAR3	HCAR2	RETN	C19ORF59	SNCA	TESC	PNPLA1	MXD1	LY6G6E	LOC653486	S100P	CMTM5	NAT8B	PTCRA	RGS2	HGD	RGS14	FRAT2	FRAT1	C19ORF35	RNASE2	CEBPE	PRSS33	CDA	GLT1D1	PTGDR2	CCR3	GP9	NFE2	ALOX12	CD19
HOS-3	Muscle	C3ORF45	ZNF205-AS1	CDNF	JPH1	PAIP2B	PHKG1	GPT	CAMK2A	TMEM38A	MAPT	PGAM2	CARNS1	PPM1J	LRRC20	PTGES3L	PTP4A3	ASB4	NDRG2	ALDH1L1	NEURL	C1ORF170	ADSSL1	NT5C1A	KCNJ11	LRRC38	RYR3	CTNNA3	LOC100128164	AGBL1	PDLIM5	SVIL	MYOM2	MYL3	SHISA4	CYB5R1	SLC25A4	ABLIM2	KLHL33	ZAK	LRRC2	FYCO1	ZFP106	AGL	SYPL2	CFL2	KLHL34	TMEM182	PRKAG3
HOS-4	Cell Cycle	TMPO-AS1	MCM3	CHAF1B	FBXO43	OIP5	ARHGEF39	FAM72A	KNTC1	C4ORF21	IQGAP3	LOC100288637	ARHGAP11B	GGH	CKS1B	UBE2S	GINS4	POLE2	FAM72D	FAM72B	KIF24	CIT	SPDL1	CTPS1	KIF4B	DIAPH3	APOBEC3B	RNASEH2A	SPC24	MND1	FANCB	C11ORF82	CENPK	MTFR2	CENPW	UBE2T	CENPH	FAM111B	TCF19	CDCA4	FAM64A	CDC7	E2F2	AUNIP	HELLS	WDHD1	EZH2	FANCA	LMNB1
HOS-5		EFHC1	ATP6V1C2	AGAP8	WDR19	ENGASE	STK36	FAM227A	GOLGA8B	GOLGA8A	SLC25A27	CLHC1	MASP2	LINC00641	H2BFXP	TWF1	FAM3C	ATHL1	ARPC4-TTLL3	BTN2A3P	EIF3C	CYP2D7P1	BMS1P4	LOC100289561	LOC100506124	ZSWIM8-AS1	LOC100289511	EBLN2	HECTD2	PI4KAP2	ANKRD36	ZNRF2P1	MAMDC4	LOC100132215	TTC14	IFT80	ZNF594	AP4B1-AS1	PRKD1	NRBP2	LOC155060	LOC100272228	LOC100131434	LOC100289019	INE1	DNHD1	CELF6	APBB3	GABBR1
HOS-6		MACC1	SLC15A2	BNIPL	SCGB1A1	C1ORF168	RXFP1	TACSTD2	HPGD	CLEC4M	IL1RL1	ALOX15B	IGFALS	SLC26A9	WNT2	DMBT1	LRRC36	FXYD3	PTPRQ	TCF21	KCNK3	ABCA3	WNT7A	SLC6A4	ACOXL	NUPR1L	SLC5A9	VIPR1	SULT2B1	LOC440335	MAL2	ECEL1P2	ESRP1	CLDN3	CAPN9	TMEM139	GRB7	PRODH	ERBB3	VSIG2	SCTR	CLDN2	HPN	CTSE	SSTR1	HNF1B	TMC5	SDR16C5	GPRIN2
HOS-7		COMTD1	SNHG8	TOMM7	MDP1	CCDC85B	SEPW1	SMIM4	HSPB1	LINC00116	HCFC1R1	ETFB	EMC9	DHRS4L2	CCDC28B	NDUFB9	NDUFB2	AAMDC	MNF1	ANAPC11	MYEOV2	TMEM256	NDUFS6	C11ORF83	SLIRP	RPS29	RPL39	C17ORF89	C7ORF55	AURKAIP1	NDUFS8	FAM195A	MRPL41	ENDOG	TRAPPC5	C19ORF60	NENF	MRPL12	ZNF593	NDUFA7	COX14	ATP5I	MRPL23	ATP5D	COX6C	UQCR10	HIGD2A	COX7C	COX8A
HOS-8	Immune-2	STAT4	NOD2	KIF21B	ACPP	IRF1	PLCG2	ARRB1	SOWAHD	SECTM1	EMR1	LY75	DENND2D	GPR171	TXK	SLC24A4	LINGO3	IQGAP2	GPR160	RPS6KA1	NCF1B	ZNF467	ARHGAP27	BEST1	PVRIG	LTA	GZMK	CD8B	FCHO1	IL17RA	PTPRJ	TNFAIP8	LPXN	SUSD3	UNC13D	CARD11	IL16	AKNA	STXBP2	PIK3CD	PRKCB	SKAP1	CCR6	SAMHD1	CASS4	SLC43A2	ARHGAP26	2017-03-01	POU2F2
HOS-9		NSMCE2	DENND1A	PINX1	MNAT1	PABPC3	GMCL1P1	RNF126P1	SMYD3	BRE	LOC550643	EFCAB11	RSRC1	CDKAL1	LOC541471	LINC00152	GSTM2P1	NDUFS4	NDUFAF2	IMMP1L	IMMP2L	FUNDC2P2	RSU1	PRPS1L1	MSRA	XRCC4	GMDS	HLA-H	HLA-G	LYRM4	FARS2	RPL36A-HNRNPH2	LOC644649	FABP5	C8ORF59	RPLP1	MRPS28	CMC1	CAMTA1	STX8	COMMD1	UQCRHL	UQCRH	PTTG3P	RPL12	RPS7	ATP5EP2	LOC344967	EDARADD
MOS-1	Immune-2	IKLRA2	KCNA3	AI504432	PDCD1	ICOS	CCR7	NAIP2	ITGAL	LOC100038947	GCSAM	SLC28A2	ADRB2	FCGR4	SIRPB1B	RGS18	IL2RB	FASL	SIRPB1A	GM5150	IL1B	FLT3	CLEC2I	CD247	SLFN4	FPR2	TNFSF14	TREML2	IPCEF1	FCHO1	CYP4F18	GAPT	FFAR2	2017-09-01	SELL	LY6C2	NAPSA	MCEMP1	SAMSN1	CSF3R	PTPRCAP	IL18R1	CD6	TBC1D10C	ACAP1	GM1966	STAT4	SAMD3	GM9733
MOS-2	Muscle	TSPAN8	GADL1	RPH3AL	PDZD3	EFCAB2	MYF5	TRP63	AMY1	PRKAG3	RBM20	GM5091	ACYP2	TMOD1	ANK1	TMEM56	GM5860	SVIP	ACHE	NEU2	UCKL1OS	GM15179	DNAJC28	UCN	CES2C	SMCO1	ASB18	AAMDC	PSTPIP2	DHDH	CYSTM1	PPP1R3C	GM572	PPIP5K1	ASB10	2310040G24RIK	KLHL38	CRAT	RILP	GDF5	DNAJB5	ZFP641	SBK2	IP6K3	PINK1	COX7A1	COQ10A	FBXO31	GM4980
MOS-3		PYROXD2	KCNH2	EHF	CHN1OS3	CD96	9130227L01RIK	9330117O12RIK	TMEM198	RTN4RL1	SLC17A9	SEC16B	IL12RB2	ADAMTS18	MYLK3	1700017G19RIK	KLF12	RAD51AP2	SCN3A	SATB1	BCL7A	CD200	TMTC2	GNAI1	NHSL1	CDK5R1	SLC35G1	MOB3B	ANKRD6	FARP2	GM10494	FAM81A	HPGD	SYBU	PLXNB1	PLCD1	PTPRZ1	A930017M01RIK	2310069G16RIK	CADM1	PTPN13	RAPH1	COL24A1	1700066M21RIK	PHEX	DKK1	MICAL3	ADAMTS9	PTPN4
MOS-4	Immune-1	RAB27A	MMP25	CTSE	AQP9	UBASH3A	ITGA2B	SLAMF1	CD226	PRAM1	FPR1	CLEC1B	GP9	ALOX12	REDRUM	HBQ1B	GM10872	E2F2	6030468B19RIK	1700047M11RIK	PDZK1IP1	F10	PADI4	IL1F9	SERPINB10	ANKRD22	MMP8	CYP4B1-PS2	SPTA1	IL1R2	HDC	ASPRV1	STFA2L1	LTB4R1	MFSD2B	LCN2	APOL11B	APOL11A	1100001G20RIK	LY6G6F	GP6	G6B	TUBB1	PRG2	MYB	CXCR2	PGLYRP1	TREM3	IFITM6
MOS-5		RNASEL	TGM1	H2-T24	SEMA4A	CD300E	PSD4	HNMT	RGS14	CD38	STAP1	CLEC4B1	B3GNT7	PLXNA4OS1	BC147527	TNFRSF13B	BC035044	VIPR1	SIGLECH	E230029C05RIK	BACH2OS	NPL	TREML4	FCRL1	PILRB2	PILRB1	EMR4	BANK1	PVRL4	PPFIA4	NCF1	ARHGAP15	MAFB	ABCG1	IL2RG	LAG3	SPN	CD69	STARD8	TSPAN32	CHP2	LYZL4	SMIM24	CD300LB	MGL2	CLEC10A	TMEM150B	GPR160	C5AR2
MOS-6		6230400D17RIK	ARID3B	SNX22	TMEM86B	KIT	ZFP69	AMT	PHTF1OS	C030034I22RIK	1500015A07RIK	NEAT1	ZFP760	GM10560	4833417C18RIK	SNHG7	RAB26OS	JAK3	GABBR1	9330151L19RIK	JPX	2900005J15RIK	ZFP692	SUV420H2	BC037034	KIFC2	GPR162	GM6297	4831440E17RIK	E330033B04RIK	GM4532	DNMT3B	B3GNTL1	ZFP101	4930520O04RIK	DANCR	RHBDL1	MAP4K2	4930404I05RIK	C920021L13RIK	GM9958	B930003M22RIK	D930048N14RIK	MIR17HG	2700038G22RIK	B230216G23RIK	ADAMTS10	KRTCAP3	DQX1
MOS-7		C730036E19RIK	PRDM8	SAMD12	GPR55	TDRD5	SERPINB8	TSPAN10	BPI	CCSER1	A730020E08RIK	NOS1AP	GM7694	4930461G14RIK	2310069B03RIK	OTOG	CEACAM16	RNF186	GLB1	ANTXR2	LAT	VSIG8	PLEKHN1	C77080	SLC44A4	RPTOROS	CCL9	4933439K11RIK	TMEM125	1700040L02RIK	HIST2H2BE	5430425K12RIK	TNFRSF17	RHOF	PERIL	1300002K09RIK	HSD3B7	TFEC	PRDM1	CAR2	BCL2A1A	CYP2S1	RASGRP1	PTPN22	TRAF1	SERPIND1	OIT3	PLS1	HS3ST4
MOS-8	Cell Cycle	SAPCD2	ARHGEF39	CCDC18	CDC25C	FBXO48	CDC7	E2F7	FAM83D	ORC1	CIT	CASC5	TROAP	ECT2	DEPDC1B	PBK	ESCO2	SPC24	TONSL	RECQL4	SHCBP1	DEPDC1A	FAM64A	CDC20	CENPH	CCNB1	HELLS	ZWILCH	FBXO5	LMNB1	SKA1	MYBL2	MCM10	RAD54B	FANCA	PRIM1	CLHC1	EME1	BC030867	LRR1	FIGNL1	2810417H13RIK	DTL	TK1	BIRC5	UBE2C	AURKA	MCM5	CDC6
MOS-9		MLPH	NEURL1B	CHST3	DISC1	MARVELD2	SNCAIP	COLGALT2	MAG	EMID1	8430427H17RIK	IFITM1	ACKR2	AGO4	ARHGAP27OS3	ARHGAP27	AGAP1	ITGA4	FGD6	MAP3K5	DTX4	LRCH1	KCTD12B	OLFML2A	BC064078	PLXND1	DNMT3A	ARHGAP18	PADI2	GPR116	EPAS1	VAV3	ARRB1	TSPAN15	ARHGAP26	MGAT4A	FRMD4B	DOCK10	TBC1D30	FLT1	DOCK9	IGFBP3	DENND3	CBX7	CARD10	TEC	IL16	ENDOU	NBEAL2
MOS-10		SERPINB1B	PCSK9	RXFP3	ITPRIP	PRKG1	LAMA2	IGF1	ASAP3	CACNG7	GATA6	PTGIR	FOXP1	TNFRSF12A	MN1	6030419C18RIK	PTRF	MXRA7	CDH3	MEDAG	GRK5	CXCL5	CXCL1	GPR85	GPR176	ANXA1	KLHDC8A	FAM46B	PMM1	LINCRNA-COX2	PRNP	FGF2	SFRP1	MFAP5	CRLF1	4833412C05RIK	GUCY1A2	BMPER	AKAP12	PPAP2A	CYB5	RHOJ	PTPRN	SPIRE2	HGF	DNMT3L	TMEM200A	DKK2	LGALS1
MOS-11		CMTM5	NTM	DNAJC6	PTCHD2	GPR37L1	SLC25A18	CALY	GRIA1	NRXN2	CACNA2D2	PPP1R1B	AIFM3	NRIP3	CADPS	SLCO1C1	SH3GL2	UGT8A	NEFH	NAP1L5	ZCCHC18	OLIG2	OLIG1	SLC1A2	PTGDS	CNTN1	ATP2B2	CSPG5	NRXN3	RIT2	ASIC2	CLDN11	NRXN1	SYNPR	SYNGR3	HEPACAM	SLC4A10	SLC22A8	LSAMP	VSTM2L	NFASC	FAIM2	KIF5A	TUBB4A	A2M	KLK6	SLC32A1	1500009C09RIK	LRRTM4
DOS-1		ENSCAFG00000021780	ENSCAFG00000030802	ENSCAFG00000025917	ENSCAFG00000023331	ENSCAFG00000000086	ENSCAFG00000012988	ENSCAFG00000022651	ENSCAFG00000002010	RPL30	ENSCAFG00000027438	ENSCAFG00000011312	ENSCAFG00000006482	CLDN9	ENSCAFG00000023391	ENSCAFG00000015927	G6PC	ENSCAFG00000021769	ENSCAFG00000027027	ENSCAFG00000032341	ENSCAFG00000012670	ENSCAFG00000024274	ENSCAFG00000020951	ENSCAFG00000031017	ENSCAFG00000025767	LRRIQ4	ENSCAFG00000000596	IQCF6	ENSCAFG00000021979	ENSCAFG00000015164	ENSCAFG00000026063	FRMPD4	ENSCAFG00000005596	ENSCAFG00000017675	ENSCAFG00000010770	ENSCAFG00000021719	ENSCAFG00000030361	ENSCAFG00000020787	ENSCAFG00000029057	KLHDC7A	ENSCAFG00000004370	ENSCAFG00000018881	NMBR	SNRPB	ENSCAFG00000032418	NAT8	ENSCAFG00000018477	ENSCAFG00000028679	ENSCAFG00000006912
DOS-2		ENSCAFG00000019184	SRRM2	BCL9	PIGZ	TRAM2	CMTM4	SIPA1L1	MAST4	GPR124	WDR6	RAD54L2	TTC28	GLI2	MKL2	HEG1	ZMIZ1	KMT2C	SLC36A1	HIPK2	GSE1	ZCCHC14	TET3	AUTS2	TIGD5	ZNF469	CEP170B	NFIC	DPP9	MTSS1L	MEGF8	KMT2A	KMT2D	PLEC	SCRIB	40794	AAK1	FOXJ2	TANC2	NOTCH2	SPEN	SOGA1	FASN	RPTOR	IQSEC1	LRP1	MBD6	ULK1	LUZP1
DOS-3	Cell Cycle	PRIM2	CENPK	CENPQ	ENSCAFG00000000230	CDC25B	ATAD5	CDC7	CDKN2C	DHTKD1	TCF19	C17ORF53	WDR62	ENSCAFG00000013158	CCNE2	EZH2	GSG2	KIF24	RAVER2	RAD54B	ENSCAFG00000003970	MCM3	NCAPD3	CENPH	CIT	DNMT3B	PIF1	ANLN	MSH2	CKAP2L	GTSE1	HAUS1	GMNN	HMGB2	E2F2	RAD54L	CENPM	CENPW	NCAPG2	SMC2	GINS4	CDKN3	KNTC1	WHSC1	E2F1	MKI67	GAS2L3	BRCA1	CHAF1B
DOS-4	Immune-1	SKAP1	CLEC2B	ENSCAFG00000031923	ENSCAFG00000003638	C17ORF99	GIMAP1	RASAL3	CD244	BCL2L14	SLAMF8	ENSCAFG00000004980	ZBP1	XAF1	GBP6	ENSCAFG00000013633	CD69	ENSCAFG00000018171	ENSCAFG00000006485	ENSCAFG00000008584	ENSCAFG00000024337	ENSCAFG00000023350	RAB19	ENSCAFG00000031023	ENSCAFG00000028856	ENSCAFG00000020204	ENSCAFG00000000829	ENSCAFG00000028829	ENSCAFG00000011090	CD6	PCED1B	ENSCAFG00000012657	TIGIT	ITK	ENSCAFG00000012872	ENSCAFG00000000498	TRBV24-1	CD96	TRBV15	ENSCAFG00000000502	ENSCAFG00000000497	GPR171	SIT1	TRBV16	ZC3H12D	CXCL13	CXCR6	ENSCAFG00000003811	ENSCAFG00000012880
DOS-5	Immune-2	BCO2	ENSCAFG00000020263	PLBD1	ENSCAFG00000031104	TREML1	GPR110	CCDC170	GALNT1	APOE	ENSCAFG00000031808	DLL1	FHL5	APOA1	BMX	MCTP1	STEAP4	SELP	MMRN1	CARD8	KLHL8	SLC7A7	FCRLA	PLAC8	CFP	ARHGAP15	IL21R	LSP1	ENSCAFG00000023615	ENSCAFG00000028809	APOBEC3H	ENSCAFG00000018214	COL5A3	ENSCAFG00000018568	CLEC7A	CRLF2	F8	ENSCAFG00000028912	IL6R	SLC39A8	RASGEF1B	ITGAM	P2RY12	FAM43A	ARHGAP27	ENSCAFG00000032099	BTNL9	SEMA3G	CD300LG
GSE21257-1		RARB	IGSF4	PREB	APCDD1	TMTC2	FLJ23191	HOMER2	UST	MYO3A	MGC26963	CHST13	ID3	ALPL	OPN3	MEF2C	CD36	KIDINS220	DENND2C	SLC8A3	COL13A1	FXYD6	SMAD6	LOC440928	SLC36A2	TMEM16E	CA3	PPFIBP2	PHOSPHO1	COL22A1	CGREF1	SMPD3	PTPRZ1	RCOR2	NCAM1	BAMBI	PANX3	RHBDL2	IFITM5	SATB2	DLX3	SP7	LOC387755
GSE21257-2		TRPV2	TPP1	CLDN23	BIRC3	ICAM1	TNFRSF9	AER61	PHCA	NRIP3	LOH11CR2A	HSD3B7	MYO1D	FLJ46536	ANPEP	GM2A	GNS	CTSK	KIAA1598	GPR137B	WWC1	CD300C	GRN	CST3	MMP9	ACP5	SPATS1	THOP1	F5	RASSF4	ALS2CR2	TNFRSF14	NDRG4	FAM109A	PSTPIP1	CD33	SH3GL2	C20orf123	LAT2	APOB48R	RGS10	CLEC4A	KIAA0040	GNPTAB	LOC133308	ATP6V0D2	SNX10	RAC2	CSTB
GSE21257-3	Immune-1	IL2RB	GZMA	LOC649143	HLA-DQB1	GPR171	AKNA	P2RY8	WARS	IL32	CST7	APOBEC3G	ZNF683	ZNFN1A1	BATF	UBD	CXCL9	GZMK	NAPSB	EHD4	CARD15	CD72	ANKRD22	PIK3CD	FLJ11259	CIITA	MYO1G	CTLA4	PRF1	FAIM3	CCR7	LTB	AMICA1	SPINT2	LOC387841	SPOCK2	CCL5	MAP4K1	NKG7	GZMH	KLRK1	EOMES	CENTB1	CD7	ITGAL	PTPRCAP	CXCR3	CXCR6	CD8A
GSE21257-4		LOC647315	MUC15	MAGEA10	FAM112B	COX7B2	CDH18	GAGE7	SSX6	VCX	GAGE6	PAGE5	DSCR8	CSAG2	CSAG1	SSX8	SSX3	VCY	LOC645037	PAGE2B	PAGE2	XAGE1	LOC653219	CSAG3A	LOC653297	LOC643425	VCX2	GAGE5	MAGEA6	MAGEA3	VCX3A	VCX-C	GAGE4	GAGE7B	GAGE8	GAGE2
GSE21257-5	Immune-2	PLAU	TBC1D2	CCL2	HCA112	TNFSF10	LAG3	CD38	F13A1	LOC283537	HEXB	RARRES3	HCP5	BIRC4BP	RNASE1	MS4A7	GPR92	SLA	IRF1	HLA-B	HLA-A	ISG20	STAT1	TMC6	TAP1	HLA-F	RTP4	ZBP1	UBE2L6	IFI35	GBP4	TRIM21	TMEM9B	FUCA1	DENND2D	PHF11	GMIP	TSPAN33	EBI3	STAB1	ENTPD1	CXCL11	CXCL10	CD209	AKR1B1	VMO1	DCAL1	TCN2	ECGF1
GSE21257-6		ITGAE	LOC642395	TXNL5	LOC402055	POLR3E	GSPT1	FZD7	PSMD6	PHF5A	NOL7	NANS	FAM14A	ANXA2P3	B4GALT1	PSMA6	PIGH	CHMP4A	C12orf62	TRIM56	LOC653778	SLK	LOC644330	USP14	LEPROTL1	DHRS8	TCEA1	ADSS	THOC1	ENOSF1	TUBA1	UBE2H	C9orf10OS	C6orf160	SYNC1	MET	SERP1	NID2	HMCN1	FLJ12649	ALDH1B1	GNA13	MYO5A	CHP	SMARCAD1	NUDT21	SEPHS1	PCTP	CD2AP
GSE21257-7	Cell Cycle	TOP2A	PBK	CDCA2	CCNF	RAD54L	TROAP	FLJ40629	DKFZp762E1312	GTSE1	FOXM1	PTTG1	C18orf24	MCM10	SPAG5	CHEK1	CDKN3	C22orf18	MELK	HMMR	C20orf129	C15orf23	KIF11	CEP55	KIF4A	STK6	KIF20A	CCNB2	SGOL2	FLJ25416	CENPA	CDCA8	KIF2C	CDC20	PLK4	PRC1	SGOL1	KIF15	CENPE	CCNA2	NUSAP1	BUB1B	SPBC25	C1orf135	CDCA5	BLM
GSE21257-8		CACNA2D2	ST8SIA2	REEP6	EPHB6	LRP5L	GLI1	FOXF1	RTN4RL1	GAD1	NRIP2	OCA2	CGN	NRCAM	LAMA2	CSMD2	C1orf187	RPIB9	LTBP4	KIFC2	FOXD2	NLGN1	KRT17	MGC45840	MUC20	DNAH1	FAM43B	COL23A1	LRP1B	C1QL4	GFRA2	FGF9	PTCHD1	D4S234E	HOXC13	CBX8	DOCK3	CACNA1H	SLC25A29	FLJ16008	ICAM5	NTNG2	NELL2	C1QL1	CITED1	UNC5A	EPHB1	ESPN	C19orf4
GSE21257-9		SPARCL1	COL15A1	SELE	PECAM1	IGFBP7	TM4SF18	CCL14	C20orf160	EMCN	CALCRL	C8orf4	AGTRL1	SLCO2A1	ADCY4	GJA4	CLEC3B	PCDH12	CLDN5	SOX7	CDH5	RAMP3	TEK
GSE21257-10		KIAA0274	LYN	ARHGEF3	PHF15	PSCD1	UBTD1	NYREN18	STAT5A	PTK9L	MVP	PSMB10	LOC124446	PPM1M	PTPNS1	FNBP1	FLJ21438	PARP12	MBP	NAGPA	CORO7	ARHGDIB	ARHGAP27
GSE21257-11		C20orf172	ZC3H8	ORMDL1	GTF3C3	LOC644560	EXOSC3	FLJ20516	CKS2	SMC2L1	NGLY1	DLG7	RTCD1	CRTC2	ANLN	ORC3L	VRK1	UBE2T	LOC651816	FDPS	MRPL9	C1orf43	TUBB8	STIL	OIP5	KIAA1524	UBE2C	TPX2	KIF14	ASPM	LOC643995	CDC2	CDCA3	BUB1	ORC1L	HCAP-G	TTK	DEPDC1	CDCA1
GSE21257-12		IGFL2	CPA4	FSTL3	EFEMP1	ANGPTL7	ADCY8	FMO2	ADRA1B	LOC644743	KRT8	CDA	FLJ90650	MMP3	AOX1	TMEM130	KRT7	S100A2	COL17A1	CST6	KRT19	PPL	LAMC2	SFN	C19orf33
GSE21257-13		RAI1	FAM18B	LOC201164	COPS3	DRG2	ALKBH5	PIGL	NT5M	M-RIP	PRPSAP2	FLII	C17orf39	ATPAF2	TOP3A	LLGL1	NBLA10383	TTC19	ZNF287	FLCN	NCOR1	MED9
GSE21257-14	Muscle	TNNC1	ENO3	MYBPC2	DES	MYH1	MYBPH	DYSFIP1	ATP1A2	COX6A2	CMYA3	TNNI2	CMYA5	MYLPF	KBTBD10	TNNC2	MB	TMOD4	MYL1	CKM	SRL	MYOT	APOBEC2	AMPD1	TNNT1	MYH2	CASQ1	TCAP	MYL2	NEB	MYOZ1	MYH7	MYBPC1
[truncated: 206 more columns]

## Sheet: species_overlap
Overlap	list_name	HUMAN 1	HUMAN 2	HUMAN 3	HUMAN 4	HUMAN 5	HUMAN 6	HUMAN 7	HUMAN 8	HUMAN 9	MOS 1	MOS 2	MOS 3	MOS 4	MOS 5	MOS 6	MOS 7	MOS 8	MOS 9	MOS 10	MOS 11	DOG 1	DOG 2	DOG 3	DOG 4	DOG 5
list name	total in list	297	133	223	185	168	142	70	183	95	93	335	155	88	302	79	123	86	174	158	123	78	90	197	91	388
HUMAN 1	297	297	0	0	0	0	0	0	0	0	11	0	3	0	123	2	3	0	18	0	0	0	0	0	6	109
HUMAN 2	133	0	133	0	0	0	0	0	0	0	6	0	0	22	4	0	1	0	1	0	1	0	0	0	0	6
HUMAN 3	223	0	0	223	0	0	0	0	0	0	0	145	1	0	0	0	0	0	0	0	0	0	1	0	0	0
HUMAN 4	185	0	0	0	185	0	0	0	0	0	0	0	0	1	0	0	0	64	0	0	0	0	0	118	0	0
HUMAN 5	168	0	0	0	0	168	0	0	0	0	0	1	0	0	1	7	0	1	0	0	0	0	0	0	0	2
HUMAN 6	142	0	0	0	0	0	142	0	0	0	1	3	2	1	1	0	2	0	1	2	1	0	0	0	0	0
HUMAN 7	70	0	0	0	0	0	0	70	0	0	0	1	0	0	0	0	0	0	0	0	0	0	0	0	0	0
HUMAN 8	183	0	0	0	0	0	0	0	183	0	30	0	2	3	29	0	5	0	6	0	0	0	0	0	25	17
HUMAN 9	95	0	0	0	0	0	0	0	0	95	0	0	0	0	0	1	0	0	0	0	0	0	0	0	0	0
MOS 1	93	11	6	0	0	0	1	0	30	0	93	0	0	0	0	0	0	0	0	0	0	0	0	0	10	9
MOS 2	335	0	0	145	0	1	3	1	0	0	0	335	0	0	0	0	0	0	0	0	0	0	1	0	0	1
MOS 3	155	3	0	1	0	0	2	0	2	0	0	0	155	0	0	0	0	0	0	0	0	0	0	0	1	2
MOS 4	88	0	22	0	1	0	1	0	3	0	0	0	0	88	0	0	0	0	0	0	0	0	0	1	1	0
MOS 5	302	123	4	0	0	1	1	0	29	0	0	0	0	0	302	0	0	0	0	0	0	0	1	0	5	94
MOS 6	79	2	0	0	0	7	0	0	0	1	0	0	0	0	0	79	0	0	0	0	0	0	0	1	0	1
MOS 7	123	3	1	0	0	0	2	0	5	0	0	0	0	0	0	0	123	0	0	0	0	0	0	0	1	6
MOS 8	86	0	0	0	64	1	0	0	0	0	0	0	0	0	0	0	0	86	0	0	0	0	0	57	0	0
MOS 9	174	18	1	0	0	0	1	0	6	0	0	0	0	0	0	0	0	0	174	0	0	0	0	1	1	63
MOS 10	158	0	0	0	0	0	2	0	0	0	0	0	0	0	0	0	0	0	0	158	0	0	0	0	0	2
MOS 11	123	0	1	0	0	0	1	0	0	0	0	0	0	0	0	0	0	0	0	0	123	0	0	0	0	0
DOG 1	78	0	0	0	0	0	0	0	0	0	0	0	0	0	0	0	0	0	0	0	0	78	0	0	0	0
DOG 2	90	0	0	1	0	0	0	0	0	0	0	1	0	0	1	0	0	0	0	0	0	0	90	0	0	0
DOG 3	197	0	0	0	118	0	0	0	0	0	0	0	0	1	0	1	0	57	1	0	0	0	0	197	0	0
DOG 4	91	6	0	0	0	0	0	0	25	0	10	0	1	1	5	0	1	0	1	0	0	0	0	0	91	0
DOG 5	388	109	6	0	0	2	0	0	17	0	9	1	2	0	94	1	6	0	63	2	0	0	0	0	0	388

## Sheet: LM22 overlap
Overlap		HUMAN 1	HUMAN 2	HUMAN 3	HUMAN 4	HUMAN 5	HUMAN 6	HUMAN 7	HUMAN 8	HUMAN 9	MOS 1	MOS 2	MOS 3	MOS 4	MOS 5	MOS 6	MOS 7	MOS 8	MOS 9	MOS 10	MOS 11	DOG 1	DOG 2	DOG 3	DOG 4	DOG 5
	total in list	297	133	223	185	168	142	70	183	95	93	335	155	88	302	79	123	86	174	158	123	78	90	197	91	388
B cells	80	5	9	0	0	1	0	0	14	0	6	0	2	0	11	0	1	0	1	0	0	1	0	0	3	7
dendritic cells	29	3	0	0	0	0	0	0	0	0	0	1	1	0	2	0	0	0	0	0	0	0	0	0	0	0
eosinophils	32	4	6	0	0	1	0	0	3	0	3	0	1	0	5	0	0	0	0	0	0	0	0	0	1	5
macrophages	67	8	0	1	0	0	1	0	2	0	0	1	0	1	6	0	3	0	2	1	0	0	0	0	2	6
mast cells	35	2	1	0	0	0	1	0	1	0	2	0	0	4	2	0	0	0	1	1	0	0	0	0	0	2
monocytes	51	23	13	0	0	0	0	0	2	0	4	0	0	4	17	0	0	0	0	0	0	0	0	0	0	7
neutrophils	18	1	12	0	0	0	0	0	0	0	1	0	0	3	0	0	2	0	0	0	0	0	0	0	0	1
NK cells	34	2	2	0	0	0	0	0	3	0	3	0	1	3	0	0	1	0	0	0	0	0	0	0	1	1
Plasma cells	33	0	0	1	0	0	0	0	2	0	1	1	0	0	1	1	0	0	0	0	0	0	0	0	1	1
T cells	178	6	3	1	3	1	1	0	45	0	19	2	3	1	4	1	2	2	0	2	1	0	0	1	24	6
