# Supplementary material for: Comparative Transcriptome Analysis Quantifies Immune Cell Transcript Levels, Metastatic Progression, and Survival in Osteosarcoma
Source: Oxford University Press journal article supplement (doi:10.1158/0008-5472.can-17-0576), 2017-10-24
Supplement: 00085472can170576-sup-179131_3_supp_4330648_kxs87j.xlsx [file 00085472can170576-sup-179131_3_supp_4330648_kxs87j.xlsx]

## Sheet: Sheet1
Supplemental Table 7 Immunohistochemistry comparison to GCESS
ID	stromal Mac387	CD3	Immune-1 GCESS	Group assignment
DOS-100	-	-	-653.901	4		group 1	no MAC387 staing no CD3 staining
DOS-116	-	-	-644.874	4		group 2	stromal Mac387
DOS-32	-	-	-632.351	1		group 3	stromal CD3e
DOS-112	+	-	-474.161	2		group 4	MAC387 staining necrotic boundary regions
DOS-84	-	-	-466.794	4
DOS-101	-	+	-424.569	3
DOS-75	-	-	-377.426	1
DOS-81	+	-	210.277	2
DOS-70	+	-	280.15	2
DOS-115	+	-	287.179	2
ID	Stromal Mac387	CD3	Immune-2 GCESS	Group assignment
DOS-75	-	-	-221.578	1
DOS-100	-	-	-184.483	4
DOS-116	-	-	-183.501106	4
DOS-32	-	-	-179.711	1
DOS-84	-	-	-115.716	4
DOS-115	+	-	-67.0586	2
DOS-81	+	-	-63.953	2
DOS-112	+	-	-34.6913	2
DOS-70	+	-	-17.3827	2
DOS-101	-	+	47.351	3
